# Supplementary material
Source: Research Square preprint supplement (doi:10.21203/rs.3.rs-9951461/v1)
Supplement: Supplementary file 1 [file feeeb41d471210b043130346.pdf]

# Supplementary information: Engineering direct nonlinear coupling between microwave photons

Adrian Copetudo,<sup>1</sup> Amon M. Kasper,<sup>1</sup> Tanjung Krisnanda,<sup>1</sup> Gregoire Veyrac,<sup>1</sup> Shushen Qin,<sup>1</sup> Hui Khoon Ng,<sup>2,1</sup> and Yvonne Y. Gao<sup>1,2,\*</sup>

<sup>1</sup>*Centre for Quantum Technologies, National University of Singapore, Singapore*

<sup>2</sup>*Department of Physics, National University of Singapore, Singapore*

(Dated: June 6, 2026)

## I. COMPARISON BETWEEN ENTANGLING OPERATIONS IN CQED

Entanglement between bosonic modes can be generated either by applying linear operations to non-classical states or by engineering nonlinear interactions between the modes themselves. A paradigmatic example of the former is the beam-splitter (BS) operation [1], which is a purely linear (Gaussian) transformation that can generate entanglement when acting on non-classical states such as single-photon or squeezed states. However, the BS is not an intrinsically entangling operation: when applied to classical states, such as vacuum or coherent states, it does not generate entanglement. Moreover, the BS does not generally preserve the individual code spaces of the oscillators, as it redistributes excitations between the modes. For example, when each oscillator is encoded in the single-photon manifold, the logical basis state

$$|1, 1\rangle \xrightarrow{\text{BS}} \frac{|2, 0\rangle + |0, 2\rangle}{\sqrt{2}}, \quad (1)$$

thereby leaving the encoded subspace. The final state in Eq. 1 is a NOON state with  $N = 2$ , which belongs to the class of Gaussian-entangleable (GE) states, defined as those states that can be generated by Gaussian operations acting on separable states [2]. However, GE states are a limited subset of all possible entangled states. For example, higher-order NOON states with  $N \geq 3$ , essential for quantum metrology applications, are non-GE. Hence, intrinsically nonlinear operations are a necessary ingredient to generate arbitrary entangled states [3].

The standard approach to generating entanglement between bosonic modes in cQED exploits the nonlinear dispersive interaction between the oscillators and an ancillary superconducting qubit. Two prominent examples are the swap–wait–swap protocol [4, 5], in which a sideband transition transfers an excitation from one oscillator to the ancilla and the resulting dispersive interaction imprints a conditional phase on the second oscillator, and the geometric-phase protocol [6], where the ancilla is driven around a closed trajectory in phase space conditioned on the photon occupations of the cavities, thereby acquiring a conditional geometric phase. Although these protocols implement nonlinear entangling

gates, they temporarily populate the ancillary element and do not preserve the individual code spaces of the oscillators throughout the operation. Consequently, they are susceptible to ancilla-induced errors and decoherence. In this work, we demonstrate an alternative approach to entangling linear bosonic modes by dynamically engineering a direct nonlinear interaction between them. Unlike previous methods, our protocol preserves the code space of each oscillator throughout the gate while keeping the ancillary nonlinear element only virtually populated. A comparison of these approaches is presented in Table I.

## II. EXPERIMENTAL DEVICE AND SYSTEM PARAMETERS

The experimental device used in this work consists of two oscillators in the form of the standard three-dimensional stub cavities, Alice and Bob, machined out of high-purity (4N6) aluminum. They are coaxial  $\lambda/4$ -resonators with cut-off frequencies around  $f_{\text{cut}} \sim 600$  MHz and stub lengths of 16.5 mm and 15.3 mm, which correspond to frequencies of 4.12 GHz and 4.41 GHz, respectively. The external surface layer ( $\sim 0.15$  mm) of the device has been chemically removed with aluminium etchant type A to reduce fabrication imperfections, achieving Q factors of  $\sim 2 \cdot 10^7$  and  $\sim 3 \cdot 10^7$ , respectively. Each oscillator is capacitively coupled to a standard auxiliary transmon that is used for state preparation and readout. The electromagnetic field distributions were simulated using Ansys HFSS, and the Hamiltonian parameters were determined using the energy participation ratio (EPR) approach provided by the python package pyEPR [10]. The Hamiltonian of both cavities and their side chips has the form

$$\begin{aligned} H_i/\hbar = & \omega_i \hat{i}^\dagger \hat{i} + \omega_{q_i} \hat{q}_i^\dagger \hat{q}_i + \omega_{rr_i} \hat{r}_i^\dagger \hat{r}_i \\ & - \frac{\alpha_{q_i}}{2} \hat{q}_i^\dagger \hat{q}_i^\dagger \hat{q}_i \hat{q}_i - \frac{K_i}{2} \hat{i}^\dagger \hat{i}^\dagger \hat{i} \hat{i} \\ & - \chi_{i q_i} \hat{i}^\dagger \hat{i} \hat{q}_i^\dagger \hat{q}_i - \chi_{q_i rr_i} \hat{q}_i^\dagger \hat{q}_i \hat{r}_i^\dagger \hat{r}_i, \end{aligned} \quad (2)$$

where  $\hat{i} = \hat{a}, \hat{b}$ , for both oscillators. All the parameters of the Hamiltonian and their physical meaning are summarized in table II.

To allow for fast initial state preparation and fast tomography, both oscillators couple to the respective auxiliary transmons in the strong dispersive coupling regime.

\* Corresponding author: yvonne.gao@nus.edu.sg

|                       | Dispersive coupling                                                                                  | Beamsplitter                                        | Direct cross-Kerr                                 |
|-----------------------|------------------------------------------------------------------------------------------------------|-----------------------------------------------------|---------------------------------------------------|
| Underlying mechanism  | Swap - wait - swap<br>Geometric phase                                                                | Four-wave mixing<br>Three-wave mixing               | Raman transition                                  |
| Crucial dynamics      | $\hat{a}^\dagger \hat{a} \hat{c}^\dagger \hat{c} \& \hat{b}^\dagger \hat{b} \hat{c}^\dagger \hat{c}$ | $\hat{a}^\dagger \hat{b} + \hat{a} \hat{b}^\dagger$ | $\hat{a}^\dagger \hat{a} \hat{b}^\dagger \hat{b}$ |
| Code-space preserving | No                                                                                                   | No                                                  | Yes                                               |
| Ancilla excitation    | Yes                                                                                                  | No (0–2%)                                           | No (<1%)                                          |
| Nonlinear process     | Yes                                                                                                  | No                                                  | Yes                                               |
| References            | [4–7]                                                                                                | [1, 8, 9]                                           | This work                                         |

TABLE I. **Entangling operations between bosonic modes in cQED.** Comparison of representative two-mode entangling protocols for bosonic oscillators, including their underlying implementation mechanism, the interaction dynamics they rely on, whether they preserve the code space of each oscillator throughout the gate, whether they involve ancillary excitations, and whether they implement an intrinsically nonlinear interaction.

| Parameter              | Description                          | Value     |
|------------------------|--------------------------------------|-----------|
| $\omega_a/2\pi$        | Alice frequency                      | 4.12 GHz  |
| $\omega_{q_a}/2\pi$    | Transmon A frequency                 | 5.65 GHz  |
| $\omega_{rr_a}/2\pi$   | Resonator A frequency                | 7.20 GHz  |
| $\alpha_{q_a}/2\pi$    | Transmon A anharmonicity             | 118.3 MHz |
| $K_a/2\pi$             | Alice self-Kerr                      | 1.3 kHz   |
| $\chi_{a q_a}/2\pi$    | Transmon A - Alice disp. shift       | 0.77 MHz  |
| $\chi_{q_a rr_a}/2\pi$ | Transmon A - Resonator A disp. shift | 0.6 MHz   |
| $\omega_b/2\pi$        | Bob frequency                        | 4.41 GHz  |
| $\omega_{q_b}/2\pi$    | Transmon B frequency                 | 5.18 GHz  |
| $\omega_{rr_b}/2\pi$   | Resonator B frequency                | 7.32 GHz  |
| $\alpha_{q_b}/2\pi$    | Transmon B anharmonicity             | 137.9 MHz |
| $K_b/2\pi$             | Bob self-Kerr                        | 2.4 kHz   |
| $\chi_{b q_b}/2\pi$    | Transmon B - Bob disp. shift         | 2.16 MHz  |
| $\chi_{q_b rr_b}/2\pi$ | Transmon B - Resonator B disp. shift | 0.45 MHz  |
| $\omega_c/2\pi$        | Coupler frequency                    | 5.22 GHz  |
| $\alpha_c/2\pi$        | Coupler anharmonicity                | 196 MHz   |
| $\chi_a/2\pi$          | Coupler - Alice disp. shift          | 0.8 MHz   |
| $\chi_b/2\pi$          | Coupler - Bob disp. shift            | 0.5 MHz   |
| $\omega_{rr_c}/2\pi$   | Coupler readout frequency            | 7.49 GHz  |
| $\chi_{c rr_c}/2\pi$   | Coupler - readout disp. shift        | 0.8 MHz   |

TABLE II. **Hamiltonian parameters of the device.** The parameters of the coupler and its readout resonator correspond to the operating flux-bias point used in Figures 3 and 4 of the main text.

The strength of this dispersive coupling is chosen such that the inherited self-Kerr non-linearity of the cavity modes,  $K_{a/b}$ , is in an acceptable range of 1-3 kHz. All the states used in the main text are prepared using numerically optimized Gradient Ascent Pulse Engineering (GRAPE) pulses [11] of  $2 \mu\text{s}$  length. Tomography is performed either by sampling the Wigner function and measuring the parity of the cavity state at different points in phase space using a standard Ramsey technique, or by using the Optimized Reconstruction via Excitation Number Sampling (ORENS) technique [12]. See Section X for further details.

### A. Coupler frequency arrangement

Both oscillators are capacitively coupled to a flux-tunable asymmetric Superconducting Quantum Interference Device (SQUID) [13] that acts as the coupler in these experiments. While flux-tunability is not strictly necessary for our protocol, it provides valuable flexibility by allowing us to avoid frequency configurations that may introduce unintended higher-order transitions and to explore different coupler frequencies within a single cooldown.

As the auxiliary transmons do not participate in the main dynamics of the engineered cross-Kerr coupling, we now focus only on the Hamiltonian of the coupler and both oscillators, given by:

$$\begin{aligned}
H_c/\hbar = & \omega_a \hat{a}^\dagger \hat{a} - \frac{K_a}{2} \hat{a}^\dagger \hat{a}^\dagger \hat{a} \hat{a} \\
& + \omega_b \hat{b}^\dagger \hat{b} - \frac{K_b}{2} \hat{b}^\dagger \hat{b}^\dagger \hat{b} \hat{b} \\
& + \omega_c \hat{c}^\dagger \hat{c} - \frac{\alpha_c}{2} \hat{c}^\dagger \hat{c}^\dagger \hat{c} \hat{c} \\
& - \chi_a \hat{a}^\dagger \hat{a} \hat{c}^\dagger \hat{c} - \chi_b \hat{b}^\dagger \hat{b} \hat{c}^\dagger \hat{c} - \frac{K_{ab}}{2} \hat{a}^\dagger \hat{a} \hat{b}^\dagger \hat{b} \\
& + \omega_{rr_c} \hat{r}^\dagger \hat{r} - \chi_{c rr_c} \hat{c}^\dagger \hat{c} \hat{r}^\dagger \hat{r},
\end{aligned} \tag{3}$$

where the experimental parameters associated with each mode used in Figures 3 and 4 in the main text are summarized in table II.

To engineer the Raman-assisted interaction described in the main text, we parametrically drive the coupler at a frequency  $\omega_d \approx \omega_c \pm |\omega_b - \omega_a|$ . Drive frequencies closer to the coupler frequency translate into a higher effective drive strength  $\xi$ . Thus, we design the oscillator frequencies  $\omega_a$  and  $\omega_b$  at close spectral proximity ( $\omega_b - \omega_a)/2\pi \approx 284$  MHz. Since this detuning is comparable to the coupler anharmonicity, we chose to drive the  $a^\dagger b|g\rangle\langle e| + h.c.$  rather than the  $ab^\dagger|g\rangle\langle e| + h.c.$  transition, in order to avoid driving the coupler in its straddling regime. Both processes are suitable to generate the desired cross-Kerr dynamics.

120 Placing the coupler frequency above the cavities al-  
 121 lows us to tune the coupling regime of the system from  
 122 essentially decoupled to almost resonant, as we increase  
 123 the biasing flux. Coupler frequencies close to the cavi-  
 124 ties result in an increased always-on natural cross-Kerr,  
 125 decreasing the on/off ratio of the gate. On the other  
 126 hand, when the coupler is close to its upper sweet spot,  
 127 we observe a drop in both oscillators dephasing times.  
 128 We attribute this to photon shot noise caused by ther-  
 129 mal excitations in the coupler and readout mode. Since  
 130 the strength of the coherent exchange interaction  $g_1$  is  
 131 proportional to the dispersive shift of both cavities, we  
 132 must consider the tradeoff between gate speed and on-off  
 133 ratio. Balancing these considerations, we typically oper-  
 134 ate at the coupler frequency range of  $5.1 \pm 0.2$  GHz, where  
 135 the natural cross-Kerr  $K_{ab}$  is below the kHz level.

### 136 B. Coupler flux delivery

137 Introducing magnetic flux while preserving the coher-  
 138 ence of the cavities in a superconducting package is a  
 139 challenging task [14]. Here, we follow the approach  
 140 in [9], where an on-chip superconducting pick-up loop [15]  
 141 transfers flux from a nearby magnetic coil to the SQUID.  
 142 The loop works as a transformer, where the magnetic flux  
 143 originating from a small superconducting coil threads the  
 144 pick-up loop, inducing a screening current which then bi-  
 145 ases the SQUID loop.

146 The magnetic coil generating the initial magnetic field  
 147 consists of  $\sim 500$  turns of NbTi superconducting wire  
 148 (SC-54S43-0.178 mm wire from Supercon) coiled around  
 149 an OFHC copper spool of 1 cm length and 4.5 mm diam-  
 150 eter. The terminals of the coil are soldered to the DC  
 151 lines at the mixing chamber (MXC) stage of the dilution  
 152 refrigerator. The spool is thermally anchored to the lid  
 153 of the cavities, which is also made of OFHC copper, and  
 154 is thermally anchored directly to the MXC stage using  
 155 a copper braid. We observed a maximum MXC stage  
 156 temperature of 26 mK when passing a current of 60 mA.

157 The design of the SQUID chip is shown in Fig. 1(a).  
 158 The geometry of the pick-up loop was optimized using  
 159 Ansys Maxwell to maximize the flux delivered to the de-  
 160 vice while minimizing the current required in the coil.  
 161 Further, we also verify that the design preserves the Q  
 162 factors of both cavities and does not introduce undesired  
 163 modes in the system. The final configuration consists of 4  
 164 distinct sections: (i) a circular region optimized to only  
 165 collect the magnetic flux piercing the chip; (ii) a con-  
 166 striction to avoid collecting the returning field; (iii) the  
 167 long sections of the transformer, spaced out to reduce the  
 168 loop self-inductance; and (iv) a narrowed section near the  
 169 SQUID loop to avoid interfering with the junction fabri-  
 170 cation during the lithography step.

171 The length of the pick-up loop is chosen to balance  
 172 two effects. First, it needs to be long enough such that  
 173 the copper coil and spool are spatially separated from  
 174 the cavities, both for ease of assembly and to prevent the

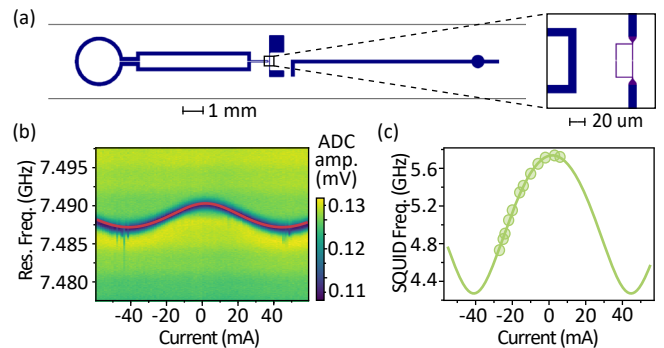

FIG. 1. **SQUID coupler tunability.** (a) Layout of the SQUID coupler chip, with the pick-up loop transformer (left), the SQUID (middle), and its readout resonator (right). (b) Readout frequency as a function of the current applied to bias the SQUID. Solid line shows the fit used to extract the current-flux relation. (c) SQUID frequency as a function of current. Solid line shows the fitted frequency.

175 electric field of the cavity TEM modes from leaking out  
 176 through the aperture of the coil, which would degrade the  
 177 cavity lifetimes. Second, the parasitic resonant modes  
 178 of the transformer, currently at 6.2 GHz and 8.1 GHz,  
 179 decrease in frequency as its length increases, potentially  
 180 interfering with other modes in the system. Finally, the  
 181 loop formed by both junctions of the SQUID, which has  
 182 an area of  $800 \mu\text{m}^2$ , is placed at a distance of  $\sim 50 \mu\text{m}$   
 183 from the flux transformer, see inset in Fig. 1(a). The  
 184 transformer has a width of  $10 \mu\text{m}$  at its narrowest point,  
 185 ensuring that it remains superconducting even with large  
 186 induced currents.

187 To mitigate the dephasing of the flux-tunable cou-  
 188 pler, we compromise on the frequency tunability range by  
 189 making both junctions asymmetric. Given the junctions  
 190 Josephson energies  $E_{J_1}$  and  $E_{J_2}$ , the effective Josephson  
 191 energy of the SQUID is

$$E_J(\Phi_{\text{ext}}) = E_{J,\Sigma} \cos\left(\pi \frac{\Phi_{\text{ext}}}{\Phi_0}\right) \sqrt{1 + \frac{E_{J,\Delta}}{E_{J,\Sigma}} \tan^2\left(\pi \frac{\Phi_{\text{ext}}}{\Phi_0}\right)}, \quad (4)$$

192 where  $E_{J,\Sigma} = E_{J_1} + E_{J_2}$  and  $E_{J,\Delta} = E_{J_1} - E_{J_2}$ . The mea-  
 193 sured frequency of the asymmetric SQUID as a function  
 194 of the applied current on the coil is shown in Fig. 1(c).  
 195 Due to the increased attenuation of the drive line at lower  
 196 frequencies and the reduced dispersive coupling to its  
 197 readout resonator, we cannot measure the coupler fre-  
 198 quency for values below 4.7 GHz. However, by fitting the  
 199 SQUID readout resonator frequency as a function of the  
 200 applied current through the coil, we extract the relation  
 201 between the current and the flux in the SQUID loop,  
 202 with 42.89 mA corresponding to half a flux quantum, see  
 203 Fig. 1(b). Finally, to extract the whole tunability range  
 204 of the SQUID and the individual Josephson energies of  
 205 both junctions, we consider the coupler-resonator Hamil-  
 206 tonian,

$$\hat{H}_c/\hbar = 4E_C\hat{n}^2 - E_J(\Phi_{\text{ext}})\cos\hat{\phi} + \omega_{rr_c}\hat{r}^\dagger\hat{r} + g(\hat{c} - \hat{c}^\dagger)(\hat{r} - \hat{r}^\dagger) \quad (5)$$

where  $E_C$  is the charging energy of the SQUID,  $\hat{n}$  and  $\hat{\phi}$  are the charge and phase operators, respectively,  $\omega_{rr_c}$  is the readout resonator frequency and  $g$  is the SQUID-resonator coupling strength. Fitting the frequencies of these two modes as a function of flux, constrained by the measured anharmonicity and the current-flux relation, we obtain the parameters shown in Table III. This allows us to determine the full SQUID tunability, spanning 4.3 GHz to 5.7 GHz, see solid line in Fig. 1(c), as well as the SQUID asymmetry,  $E_{J_1}/E_{J_2} \approx 3.7$ , which closely matches the designed asymmetry during fabrication. These are the parameters used in Floquet simulation in Section VI.

| Parameter           | Value                 | Description         |
|---------------------|-----------------------|---------------------|
| $E_{J_1}$           | $19.0 \pm 0.1$ GHz    | Josephson energy    |
| $E_{J_2}$           | $5.2 \pm 0.1$ GHz     | Josephson energy    |
| $E_C$               | $181.4 \pm 0.1$ MHz   | Charging energy     |
| $g$                 | $0.10 \pm 0.02$ GHz   | Coupling constant   |
| $\omega_{r_0}/2\pi$ | $7.484 \pm 0.002$ GHz | Resonator frequency |

TABLE III. **Hamiltonian parameters of the SQUID coupler.** Parameters were fitted to reproduce the resonator and coupler flux tunability as a function of the applied current, with the additional constraint of reproducing the experimental anharmonicity of the coupler.

### C. System coherences

Each transmon and its readout resonator are addressed through a shared coupling port, whose position is optimized in Ansys HFSS to suppress radiative decay of the transmons into the measurement lines, thereby achieving intrinsic Purcell filtering [16]. This approach preserves transmon coherence without the need for on-chip Purcell filters, reducing chip size, mitigating susceptibility to vibrations, and enabling a more compact device. The coherence times of both side transmons and the SQUID coupler are shown in Table IV. The coupler coherence times depend strongly on the its frequency configuration, with  $T_1$  times ranging from 50  $\mu\text{s}$  at the lowest-measured frequency to 10  $\mu\text{s}$  at its upper sweet spot, where the coupler hybridizes more strongly with its readout resonator. On the other hand, the dephasing times range from up to 20  $\mu\text{s}$  at the flux sweet spot to 1  $\mu\text{s}$  at the most sensitive location. The coupler coherence times in the configuration used to obtain the final data for Figures 3 and 4 in the main text are shown in Table IV. Importantly, although the coupler is operated near its most flux-sensitive point, its intrinsic decoherence does not significantly affect the quality of the gate, since the Raman-assisted interaction is mediated through virtual processes that avoid populating its excited states.

In contrast, cavity decoherence directly limits the

| Param.       | Value ( $\mu\text{s}$ ) | Param.       | Value ( $\mu\text{s}$ ) | Param.     | Value ( $\mu\text{s}$ ) |
|--------------|-------------------------|--------------|-------------------------|------------|-------------------------|
| $T_{1q_a}$   | 25                      | $T_{1q_b}$   | 50-60                   | $T_{1c}$   | 50                      |
| $T_{2q_a}^*$ | 18                      | $T_{2q_b}^*$ | 40-50                   | $T_{2c}^*$ | 2.5                     |
| $T_{2q_a}^E$ | 22                      | $T_{2q_b}^E$ | 50                      | $T_{2c}^E$ | 10                      |
| $T_{1a}$     | 700-900                 | $T_{1b}$     | 800-1000                |            |                         |
| $T_{2a}$     | 500-600                 | $T_{2b}$     | 700-900                 |            |                         |

TABLE IV. **Device coherence times.** Coherence times for the coupler are quoted at the flux point used in the main text. Transmon  $T_2^*$  were measured with a standard Ramsey technique, while  $T_2^E$  times were obtained via a Hahn-echo experiment. Oscillator  $T_1$  times were measured by fitting the decay of both coherent states and single photons. Oscillator  $T_2$  times were measured through a Ramsey experiment using SNAP pulses.

achievable quality of the engineered cross-Kerr interaction. The cavities are designed to be internal Q limited, with coupling ports designed to have coupling quality factors on the order of  $\sim 10^9$ . Good care was also taken to minimize the cavity photon field from leaking into the coil used to bias the SQUID. We measured cavity  $T_1$  times both by initializing a coherent state and measuring its characteristic decay, and by loading a photon in the cavity using SNAP pulses and fitting an exponential decay. Both methods give consistent results with average single-photon lifetimes of 800  $\mu\text{s}$  and 900  $\mu\text{s}$  for Alice and Bob, respectively. The cavity  $T_2$  times were measured using a standard Ramsey technique, where they are initialized in  $(|0\rangle + |1\rangle)/\sqrt{2}$  using SNAP pulses and, after a variable wait time, they are displaced by  $D(\alpha = -0.8e^{i\omega t})$ . This displacement maximizes the overlap with vacuum for  $|0\rangle + |1\rangle$  and minimizes it for  $|0\rangle - |1\rangle$ , and  $\omega$  is a fixed virtual detuning that facilitates extracting the  $T_2$  dephasing time by fitting the data to an exponentially decaying sinusoid.

### D. Auxiliary transmon readout

Both the auxiliary transmons and the SQUID coupler are measured using Cavity Level Excitation and Reset (CLEAR) readout pulses [17] applied to their respective readout resonators. In contrast to a conventional constant-amplitude readout pulse, the CLEAR protocol employs a sequence of five piecewise-constant segments: two ring-up segments, one steady-state segment, and two ring-down segments. This pulse shaping offers high-fidelity state discrimination while significantly reducing the residual photon population after the measurement pulse. Compared to standard square pulses, CLEAR pulses achieve faster resonator reset and therefore support reduced measurement-induced backaction and shorter experimental cycle times. The amplitudes and duration of the individual CLEAR drive segments are optimized running an algorithm that minimizes the population of the resonator after the CLEAR pulse given the decay time of the resonator  $1/\kappa$  and the dispersive

285 shift to the transmon  $\chi$ .

286 In addition to CLEAR pulse shaping, our readout is  
 287 typically optimized to differentiate between states  $|g\rangle$   
 288 and  $|f\rangle$ , which improves the separation of the histogram  
 289 counts for the same integration time compared to dis-  
 290 criminating between  $|g\rangle$  and  $|e\rangle$ , as  $\chi_{gf} \approx 2\chi_{ge}$ . After  
 291 each experimental sequence we map the  $|e\rangle$  population  
 292 to the  $|f\rangle$  state using a  $\sigma = 24$  ns gaussian pulse. The re-  
 293 sulting confusion matrices for both auxiliary transmons  
 294 used in the tomography and state preparation steps are:

$$M_{\text{RO},A} = \begin{pmatrix} P(g|g) = 97.5\% & P(e|g) = 2.5\% \\ P(g|e) = 2.8\% & P(e|e) = 97.2\% \end{pmatrix}$$

$$M_{\text{RO},B} = \begin{pmatrix} P(g|g) = 95.9\% & P(e|g) = 4.1\% \\ P(g|e) = 6.4\% & P(e|e) = 93.6\% \end{pmatrix}$$

### 295 E. Chip fabrication

296 The ancillary transmon chips and the SQUID coupler  
 297 chip are fabricated in aluminum on a sapphire substrate.  
 298 A HEMEX sapphire wafer is cleaned in a 2:1 piranha  
 299 solution for 20 minutes and rinsed in de-ionized (DI)  
 300 water for another 20 minutes. It is then quickly rinsed  
 301 in methanol and blown-dry with nitrogen. The wafer is  
 302 coated with 700 nm of MMA and 200 nm of PMMA re-  
 303 sist by spinning it for 100 seconds at 2000 rpm and bak-  
 304 ing it for 5 minutes at 200°C. A  $\sim 10$ -nm discharge gold  
 305 layer is sputtered in a Cressington sputterer at 30 mA  
 306 for 30 seconds. The design is patterned using a Raith  
 307 electron-beam lithography machine. The gold layer is re-  
 308 moved in a KI solution and rinsed in DI water, prior to  
 309 developing the resist in a 3:1 mixture of DI water and  
 310 isopropanol at 6°C for 2 minutes. The wafer is then  
 311 loaded into an Angstrom Engineering double-angle evap-  
 312 orator and pumped to  $10^{-8}$  mbar, after which the resist  
 313 is ion milled in a mixture of 85% O<sub>2</sub> and 15% Argon, at  
 314 400 V for 15 s at -20° and 15 s at 20° to clean any resist  
 315 residues. We deposit two aluminum layers of 20 nm and  
 316 30 nm thickness at -20° and +20°, respectively, separated  
 317 by an oxidation step with a mixture of 85% O<sub>2</sub> and 15%  
 318 Argon at 20 mbar for 20 minutes. Before unloading the  
 319 wafer, a final capping layer with the same oxidation con-  
 320 ditions is performed to grow a more controlled surface  
 321 oxide. The remaining resist is then lifted off in NMP at  
 322 90°C for 3 hours, then rinsed in acetone and methanol.  
 323 Finally, a protective layer of AZ1512 photoresist is spun  
 324 at 2000 rpm and baked at 80°C for 1 minute, and the in-  
 325 dividual chips are diced on an Accretech machine with a  
 326 resin blade at 15000 rpm. The chips are finally cleaned in  
 327 NMP, acetone and methanol, blown-dry and inserted into  
 328 the waveguides using an aluminum clamps with indium  
 329 wire to improve thermalization.

### 330 III. SNAP PULSES

331 We use Selective Number-dependent Arbitrary Phase  
 332 (SNAP) pulses [18] to prepare the oscillators in Fock state  
 333  $|1\rangle$  and the superposition state  $(|0\rangle + |1\rangle)/\sqrt{2}$ , to measure  
 334 the single-photon decay rate and dephasing rate of the  
 335 oscillators, respectively. The SNAP pulses consist of an  
 336 initial displacement of the oscillators by  $\alpha_1$ , a phase,  $\theta_n$ ,  
 337 imparted on the transmon state conditioned on the oscil-  
 338 lator having  $n$  photons, and a final displacement of the  
 339 oscillators by  $\alpha_2$ . All parameters used can be found in  
 340 Table V. Oscillator displacements were performed using  
 341 100 ns constant pulses with 32 ns cosine ramps at the res-  
 342 onant frequency of the oscillators. The conditional  $\theta_n = \pi$   
 343 phases were realized by driving the transmons through a  
 344 full  $2\pi$ -rotation around the Bloch sphere, using gaussian  
 345 pulses of  $\sigma_a = 960$  ns and  $\sigma_b = 400$  ns, applied at the res-  
 346 onance frequency of each transmon conditioned on the  
 347 oscillator containing  $n$  photons.

| Transition                                                     | $\alpha_1$ | $\theta_0$ | $\theta_1$ | $\alpha_2$ |
|----------------------------------------------------------------|------------|------------|------------|------------|
| $ 0\rangle \rightarrow  1\rangle$                              | 1.14       | $\pi$      | 0          | -0.58      |
| $ 0\rangle \rightarrow \frac{ 0\rangle +  1\rangle}{\sqrt{2}}$ | 0.56       | $\pi$      | 0          | -0.24      |
| $\frac{ 0\rangle -  2\rangle}{\sqrt{2}} \rightarrow  0\rangle$ | -0.35      | $\pi$      | $\pi$      | 1.04       |

TABLE V. **Different SNAP parameters used in the main text.** First row corresponds to the creation of a single photon in the oscillators, used to measure their decay time. Second row corresponds to the creation of a superposition state in the oscillators, used to measure their dephasing time in a Ramsey experiment. Last row corresponds to the pulse used in the direct cavity-cavity parity mapping, shown in Fig. 4(c) of the main text.

348 In the direct parity mapping protocol described in  
 349 Fig. 4(c) in the main text, we use a SNAP pulse to map  
 350 the even and odd superposition states of Bob to

$$\begin{aligned} \frac{|0\rangle - |2\rangle}{\sqrt{2}} &\rightarrow |0\rangle \\ \frac{|0\rangle + |2\rangle}{\sqrt{2}} &\rightarrow 0.9|1\rangle + 0.4|2\rangle + \dots \end{aligned}$$

351 A selective  $\pi$ -pulse to Bob's auxiliary transmon condi-  
 352 tioned on Bob being in vacuum hence maps  $(|0\rangle - |2\rangle)/\sqrt{2}$   
 353 and  $(|0\rangle + |2\rangle)/\sqrt{2}$  to  $|e\rangle$  and  $|g\rangle$ , respectively. The dis-  
 354 placement amplitudes used to implement this transfor-  
 355 mation were obtained via a Nelder-Mead optimization  
 356 that maximizes the probability of the final state being  
 357 either in vacuum or not vacuum. The parameters of the  
 358 SNAP sequence are listed in the last row of Table V.

### 359 IV. WIRING DIAGRAM

360 The microwave signals to drive the oscillators, auxil-  
 361 iary transmons, coupler, and readout resonators of our

device are directly generated from digital waveforms via Direct-Digital-Synthesis (DDS) by a Digital-to-Analog Converter (DAC) of a Quantum Machines OPX1000 Field-Programmable Gate Array (FPGA). We also place band-pass filters at the output line of the OPX1000, which increased the transmon coherence times significantly. Additionally, a RF switch (HMC-C058) placed on the coupler line provides an additional layer of noise protection. Importantly, most of the coupler drive line attenuation at the MXC stage is replaced by a Mini-circuits 5500+ low-pass filter and Mini-circuits 5500+ high-pass filter, which provide -30 dB attenuation at 5.0 GHz but only -10 dB at 5.5 GHz to be able to drive the coupler strongly, while still providing at least 60 dB attenuation at the oscillator frequencies and 35 dB at the resonator frequency.

Readout is performed using the standard reflection technique. The reflected signal, amplified by a High-Electron mobility transistor (HEMT - LNF-LNC48C) as well as a ZVA-183-S+ room temperature amplifier, is directly sampled by a high-speed Analog-to-Digital Converter (ADC) of the OPX1000 FPGA. The digital signal is then downconverted and separated into I and Q components. The DC current sent to the coil is generated in a YOKOGAWA GS200 DC voltage/current source. To shield our device from external electromagnetic noise it is placed in a standard Cryoperm shield and anchored directly at the MXC plate. The schematic of the wiring can be seen below in Fig. 2

## V. ANALYTICAL DERIVATION OF THE ENGINEERED DYNAMICS

The Hamiltonian of the two oscillators and the SQUID coupler is

$$H(t)/\hbar = \tilde{\omega}_a \hat{a}^\dagger \hat{a} + \tilde{\omega}_b \hat{b}^\dagger \hat{b} + \tilde{\omega}_c \hat{c}^\dagger \hat{c} - E_J(\Phi_{\text{ext}}) \left( \cos \hat{\phi} + \frac{1}{2!} \hat{\phi}^2 \right) + \epsilon(t)(\hat{c} + \hat{c}^\dagger), \quad (6)$$

where  $\tilde{\omega}_a$  and  $\tilde{\omega}_b$  are the bare (uncoupled) oscillator frequencies,  $\tilde{\omega}_c = \sqrt{8E_J(\Phi_{\text{ext}})E_C}$  is the Josephson plasma frequency of the coupler,  $\epsilon(t)$  is the time-dependent drive on the coupler and

$$\hat{\phi} = \phi_c (\hat{c} + \hat{c}^\dagger) + \phi_a (\hat{a} + \hat{a}^\dagger) + \phi_b (\hat{b} + \hat{b}^\dagger)$$

is the quantized phase of the coupler, that considers the participation of both oscillator fields in the junction.

The zero-point fluctuations of the coupler in the junction is defined as  $\phi_c = (2E_C/E_J(\Phi_{\text{ext}}))^{1/4}$ , while the zero-point fluctuations of the oscillators in the junction are approximated by  $\phi_a \approx \frac{g_a}{\Delta_a} \phi_c$  and  $\phi_b \approx \frac{g_b}{\Delta_b} \phi_c$ . Considering a drive of the form  $\epsilon(t) = 2\varepsilon \cos(\omega_d t + \phi_d)$ , we can go to the displaced frame  $\hat{c} \rightarrow \hat{c} + \xi e^{-i\omega_d t}$  with

$\xi = \varepsilon/(\omega_d - \tilde{\omega}_c)$ , where the drive term is absorbed into the phase variable through

$$\hat{\phi} = \phi_c (\hat{c} + \hat{c}^\dagger + \xi e^{-i\omega_d t} + \xi^* e^{i\omega_d t}) + \phi_a (\hat{a} + \hat{a}^\dagger) + \phi_b (\hat{b} + \hat{b}^\dagger).$$

By expanding the cosine in Eq. 6 up to fourth order in  $\hat{\phi}$ , and keeping all the terms that are naturally on-resonance, we obtain the full Hamiltonian of the system

$$\begin{aligned} \hat{H}_0 = & \omega_a \hat{a}^\dagger \hat{a} - \frac{K_a}{2} \hat{a}^\dagger \hat{a}^\dagger \hat{a} \hat{a} \\ & + \omega_b \hat{b}^\dagger \hat{b} - \frac{K_b}{2} \hat{b}^\dagger \hat{b}^\dagger \hat{b} \hat{b} \\ & + \omega_c \hat{c}^\dagger \hat{c} - \frac{\alpha}{2} \hat{c}^\dagger \hat{c}^\dagger \hat{c} \hat{c} \\ & - \chi_a \hat{a}^\dagger \hat{a} \hat{c}^\dagger \hat{c} - \chi_b \hat{b}^\dagger \hat{b} \hat{c}^\dagger \hat{c} - K_{ab} \hat{a}^\dagger \hat{a} \hat{b}^\dagger \hat{b}, \end{aligned} \quad (7)$$

where  $K_a$  and  $K_b$  are the cavity self-Kerrs inherited from the coupler non-linearity,  $\alpha$  is the coupler non-linearity (anharmonicity),  $\chi_a$  and  $\chi_b$  are the coupler-cavity cross-Kerrs (dispersive shifts), and  $K_{ab}$  is the residual always-on cavity-cavity cross-Kerr. All these terms produce Lamb and Stark shifts on the bare mode frequencies, which get renormalized as

$$\begin{aligned} \omega_a = & \tilde{\omega}_a - \frac{\chi_a}{2} - K_a - \frac{K_{ab}}{2} - \chi_a |\xi|^2 \\ \omega_b = & \tilde{\omega}_b - \frac{\chi_b}{2} - K_b - \frac{K_{ab}}{2} - \chi_b |\xi|^2 \\ \omega_c = & \tilde{\omega}_c - \alpha - \frac{\chi_a}{2} - \frac{\chi_b}{2} - 2\alpha |\xi|^2, \end{aligned}$$

where the last term of each equation corresponds to the drive-induced AC Stark shifts.

By moving to a frame rotating at  $\omega_a \hat{a}^\dagger \hat{a} + \omega_b \hat{b}^\dagger \hat{b} + \omega_c \hat{c}^\dagger \hat{c}$  and restricting the coupler basis to the first two energy levels  $\{|g\rangle, |e\rangle\}$ , we find that the drive frequency

$$\omega_d = \omega_c + \omega_b - \chi_b - \omega_a + \Delta, \quad (8)$$

where  $\Delta$  is the detuning to the resonance condition, successfully activates the dynamics given by

$$H_d(t) = g_1 e^{it\Delta} \hat{a}^\dagger \hat{b} |g\rangle \langle e| + g_1^* e^{-it\Delta} \hat{a} \hat{b}^\dagger |e\rangle \langle g|, \quad (9)$$

which corresponds to Eq. 2 in the main text. The strength of this interaction is given by

$$g_1 = E_J \phi_c^2 \phi_a \phi_b \xi^* \approx \sqrt{\chi_a \chi_b} \xi^*. \quad (10)$$

We measured the coherent exchange rate,  $g_1$ , for different effective drive strengths  $|\xi|$  obtained from the coupler AC Stark shift, as shown in Fig. 3(a). The slope of the interaction rate is in very good agreement with the prediction of Eq. 10 using the experimentally measured dispersive shifts (solid line).

To find an analytical equation for the engineered cross-Kerr, we diagonalize the interaction term of Eq. 9, by applying a time-independent Schrieffer-Wolff transformation (SWT) [19, 20] in the rotating frame of the drive.

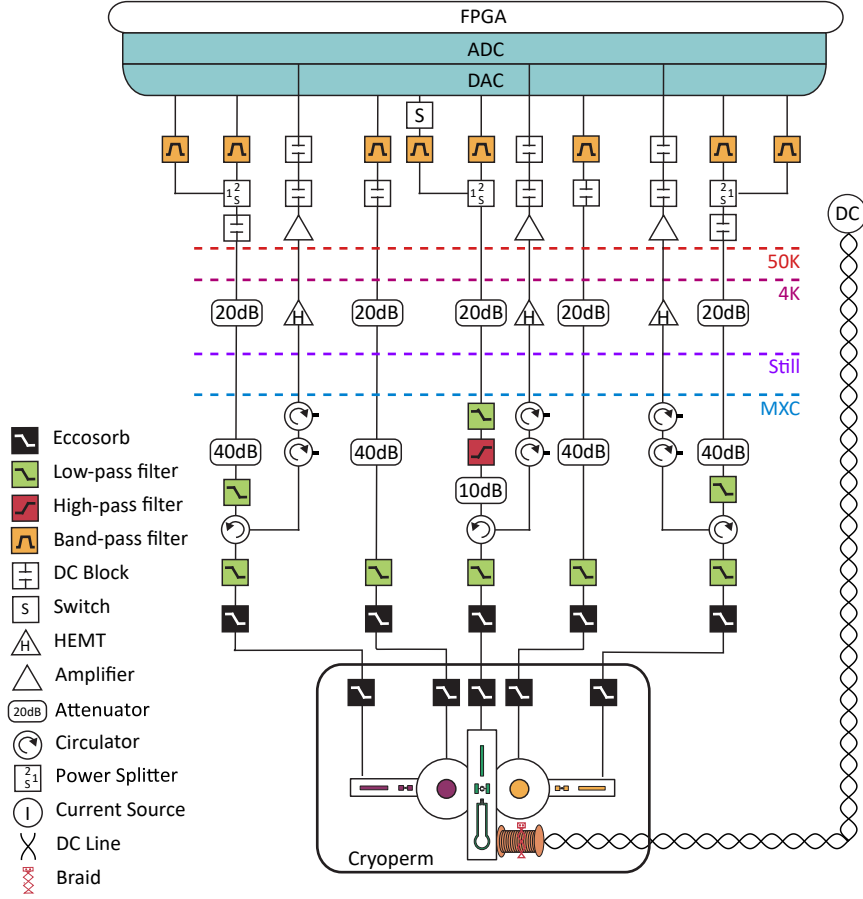

FIG. 2. **Experimental wiring setup.** Schematic of the RF components and connections at room temperature and inside the Bluefors dilution refrigerator. Most of the attenuation for the coupler drive line is replaced by a low-pass filter in series with a high-pass filter that act as a 5-7 GHz band-pass filter.

427 This is equivalent to applying a time-dependent SWT in  
 428 the rotating frame of the coupler, which is also equivalent  
 429 to performing a second-order RWA [21].

$$\begin{aligned}
 \hat{H}'_0/\hbar = & \omega_a \hat{a}^\dagger \hat{a} - \frac{K_a}{2} \hat{a}^\dagger \hat{a}^\dagger \hat{a} \hat{a} \\
 & + \omega_b \hat{b}^\dagger \hat{b} - \frac{K_b}{2} \hat{b}^\dagger \hat{b}^\dagger \hat{b} \hat{b} \\
 & + (\omega_c - \omega_d) \hat{c}^\dagger \hat{c} - \frac{\alpha}{2} \hat{c}^\dagger \hat{c}^\dagger \hat{c} \hat{c} \\
 & - \chi_a \hat{a}^\dagger \hat{a} \hat{c}^\dagger \hat{c} - \chi_b \hat{b}^\dagger \hat{b} \hat{c}^\dagger \hat{c} - K_{ab} \hat{a}^\dagger \hat{a} \hat{b}^\dagger \hat{b},
 \end{aligned} \tag{11}$$

432 while the perturbation is given by

$$\hat{V}/\hbar = g_1 \hat{a}^\dagger \hat{b} |g\rangle \langle e| + g_1^* \hat{a} \hat{b}^\dagger |e\rangle \langle g|. \tag{12}$$

430 In the rotating frame of the drive, the diagonal part of  
 431 the Hamiltonian reads

433 The SWT consists of finding an anti-Hermitian generator  $\hat{S} = -\hat{S}^\dagger$  that satisfies

$$\hat{V} = [\hat{H}'_0, \hat{S}], \tag{13}$$

434 which transforms the Hamiltonian to

$$\hat{H}' = e^{\hat{S}} (\hat{H}'_0 + \hat{V}) e^{-\hat{S}} = \hat{H}'_0 + \hat{V} + [\hat{S}, \hat{H}'_0] + [\hat{S}, \hat{V}] + \frac{1}{2!} [\hat{S}, [\hat{S}, \hat{H}'_0]] + \dots \approx \hat{H}'_0 + \frac{1}{2} [\hat{S}, \hat{V}] \tag{14}$$

435 By choosing a generator of the form

$$\hat{S} = \beta \left( \hat{a}^\dagger \hat{b} |g\rangle \langle e| - \hat{a} \hat{b}^\dagger |e\rangle \langle g| \right), \quad (15)$$

we can solve Eq. 13 to find the expression for  $\beta$ . Since the commutator

$$\left[ \hat{H}'_0, \hat{a}^\dagger \hat{b} |g\rangle \langle e| \right] = (\omega_d - \omega_c + \omega_a - \omega_b - K_a(\hat{n}_a - 1) + K_b \hat{n}_b + \chi_a(\hat{n}_a - 1) + \chi_b(\hat{n}_b + 1) - K_{ab}(\hat{n}_b - \hat{n}_a + 1)) \hat{a}^\dagger \hat{b} |g\rangle \langle e|$$

depends on the number of photons in both cavities, we expand the transformation generator as

$$\hat{S} = \sum_{n_a, n_b} \beta_{n_a n_b} (|n_a, n_b, g\rangle \langle n_a - 1, n_b + 1, e| - |n_a - 1, n_b + 1, e\rangle \langle n_a, n_b, g|), \quad (16)$$

where

$$\beta_{n_a n_b} = \frac{\sqrt{n_a(n_b + 1)} g_1}{\omega_d - \omega_c + \omega_a - \omega_b - K_a(n_a - 1) + K_b n_b + \chi_a(n_a - 1) + \chi_b(n_b + 1) - K_{ab}(n_b - n_a + 1)}. \quad (17)$$

Finally, solving Eq. 14 leads to

$$\hat{H}' = \hat{H}'_0 + \sum_{n_a, n_b} \beta_{n_a n_b} \sqrt{n_a(n_b + 1)} g_1 (|n_a, n_b, g\rangle \langle n_a, n_b, g| - |n_a - 1, n_b + 1, e\rangle \langle n_a - 1, n_b + 1, e|). \quad (18)$$

With these analytical results, we can see that when we parametrically drive this dynamics, the energies of the states  $|1\rangle|0\rangle|g\rangle$  and  $|1\rangle|1\rangle|g\rangle$  are shifted by

$$\Delta E_{10} = \frac{g_1^2}{\Delta}, \quad (19)$$

$$\Delta E_{11} = \frac{2g_1^2}{\Delta + \chi_b + K_b - K_{ab}} \approx \frac{2g_1^2}{\Delta + \chi_b}. \quad (20)$$

Eq. 19 shows that in presence of the parametric drive, despite Bob being in vacuum, the state  $|+\rangle|0\rangle|g\rangle$  will acquire a phase at a rate  $\Delta E_{10}$ . Hence, it is important to track the frame of the oscillators (on software) for any subsequent operation. For instance, the frame is tracked as a virtual detuning applied to the displacement pulses used for Wigner tomography. The phase acquired by the state  $|+\rangle|0\rangle|g\rangle$  was also experimentally measured as a function of the detuning  $\Delta$ , see green markers in Fig. 3(b), which agrees with the prediction of Eq. 19 (solid green line). Finally, the total cross-Kerr induced in the 0/1 photon subspace is thus

$$\begin{aligned} g_{ab} &= E_{11} - E_{10} - E_{01} + E_{00} \\ &= -K_{ab} + \Delta E_{11} - \Delta E_{10} \\ &= -K_{ab} + \frac{g_1^2}{\Delta} \frac{\Delta - (\chi_b + K_b - K_{ab})}{\Delta + (\chi_b + K_b - K_{ab})}, \end{aligned} \quad (21)$$

where  $E_{ij}$  refers to the energy of the state  $|i\rangle|j\rangle|g\rangle$  and  $K_{ab}$  is the always-on residual cross-Kerr. We measured the cross-Kerr  $g_{ab}$  by tracking the oscillations of  $|+\rangle|1\rangle|g\rangle$  in the frame where  $|+\rangle|0\rangle|g\rangle$  does not oscillate, at different drive powers for a fixed detuning of  $\Delta = -5$  MHz, see blue markers in Fig. 3(c). Notice that at different drive powers, the AC Stark shifted frequency of the coupler is

different, which subsequently modifies the coherent exchange frequency  $\omega_e$ . The solid blue line corresponds to the analytical behavior of Eq. 21, which underpredicts the measured interaction strength. We believe this discrepancy arises because the analytical model does not account for the enhanced hybridization between the modes under the strong drive, which renormalizes the dispersive shifts and the detunings. A full Floquet simulation (orange triangles) reproduces the experimental observations in very good agreement. For more details on the Floquet simulation, see Section VI.

The analytical model still qualitatively captures the asymmetric behavior of the engineered cross-Kerr between positive and negative detunings, see purple markers in Fig. 3(d). The green (yellow) dotted line corresponds to  $-\Delta E_{10}$  ( $+\Delta E_{11}$ ), which diverges at  $\Delta = 0$  ( $\Delta \approx -\chi_b$ ). The solid purple line is the sum of both, which qualitatively reproduces the main features observed in the experimental data. For a quantitative agreement, it is desirable to model the system using Floquet theory, as shown in Fig. 2(b) of the main text.

## VI. FLOQUET SIMULATIONS

In the presence of strong parametric drives, the system is governed by a time-periodic Hamiltonian in which the drive-induced shifts of the energy level give rise to unintended multi-photon transitions between the oscillators and higher levels of the coupler, beyond the coherent exchange interaction considered analytically. This scenario is appropriately addressed within the Floquet formalism [8, 22, 23]. We perform Floquet simulations using the QuTiP python package [24] to analyze the effects of the parametric drive on the subsystem composed

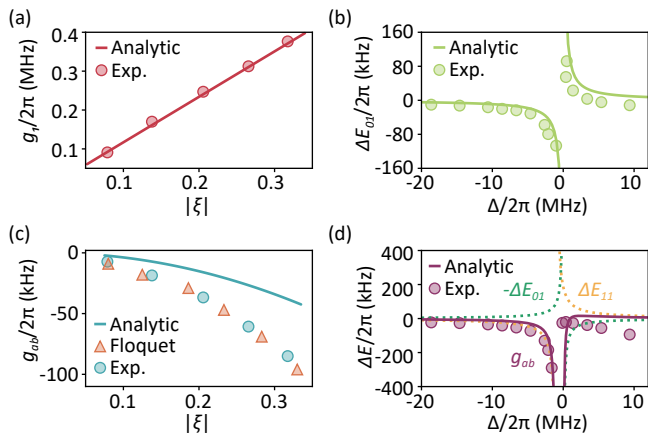

FIG. 3. **Analytical predictions based on the SWT.** (a) Coherent exchange rate,  $g_1$ , as a function of the effective drive strength,  $|\xi|$  (red circles). The analytical prediction of Eq. 10 is in close agreement (solid line). (b) Phase rate acquired by the state  $|+\rangle|0\rangle|g\rangle$  (green circles) as a function of the detuning  $\Delta$  to the coherent exchange condition. Analytics correspond to the prediction from Eq. 19 (solid line). (c) Cross-Kerr strength (blue circles) measured at a fixed  $\Delta = -5$  MHz, as a function of drive power. Analytical prediction (solid line) based on Eq. 21 under-predicts the strength by a factor of 2. However, a full Floquet simulation (orange triangles) is in very good agreement with the data. (d) Cross-Kerr strength (purple circles) as a function of the detuning  $\Delta = -5$  MHz. The purple line corresponds to the sum of the yellow and green lines, which exhibit discontinuities at  $\Delta = 0$  and  $\Delta \approx -\chi_b$ , respectively.

of the SQUID coupled to both cavities, ignoring the side auxiliary transmons. The Hilbert spaces are truncated to dimension  $D = 12$  for the SQUID and  $D = 4$  for the cavities. The full Hamiltonian considered in the simulation is

$$\begin{aligned}
 H/\hbar = & 4E_C\hat{n}^2 - E_J(\Phi_{\text{ext}})\cos\hat{\phi} \\
 & + \omega_a\hat{a}^\dagger\hat{a} + \omega_b\hat{b}^\dagger\hat{b} \\
 & - g_{ac}(\hat{a}^\dagger - \hat{a})(\hat{c}^\dagger - \hat{c}) \\
 & - g_{bc}(\hat{b}^\dagger - \hat{b})(\hat{c}^\dagger - \hat{c}) \\
 & + \epsilon\cos(\omega_d t)(\hat{c}^\dagger + \hat{c}),
 \end{aligned} \tag{22}$$

where the coupler charging and Josephson energies are those obtained by fitting the experimental data, and summarized in Table III; the oscillator frequencies are those measured experimentally through two-tone spectroscopy; the capacitive coupling strength between the oscillators and the SQUID are taken as  $g_a/2\pi = 43.07$  MHz and  $g_b/2\pi = 22.56$  MHz, to reproduce the experimentally measured dispersive shifts; and the drive amplitude  $\epsilon$  is calibrated to reproduce the measured coupler AC Stark shift.

The  $200\text{ ns}\cos^2$  ramps for the parametric drive ensure that the undriven eigenstates adiabatically map onto Floquet modes. For a given drive frequency  $\omega_d$  and amplitude  $\epsilon$ , we label each Floquet mode by the eigenstate of

the undriven system with which it has the highest overlap. The Floquet quasienergies, defined modulo  $\omega_d$ , are unfolded into real energies by adding or subtracting integer multiples of  $\omega_d$  such that they lie within  $\pm 20\%$  of the energy of their corresponding undriven eigenstate. The cross-Kerr between the cavities is then obtained as the difference in the transition energy of Alice when Bob is in vacuum or in  $|1\rangle$ . The cross-Kerr strength obtained from Floquet simulations, as a function of drive amplitude and detuning, is in very good agreement with the experimental data, see triangle markers in Fig. 3(c) and solid line in Fig. 2 of the main text, respectively. In the latter case, deviations at large detunings arise from the proximity of a single-cavity transition between  $|0\rangle|1\rangle|g\rangle$  and  $|0\rangle|0\rangle|f\rangle$ , which significantly enhances Bob's self-Kerr and its cross-Kerr coupling to Alice [25]. We attribute this discrepancy to uncertainties in some Hamiltonian parameters, particularly  $g_b$ , which were calibrated solely from independently measured experimental observables without additional fitting.

## VII. CALIBRATION OF COHERENT EXCHANGE RATE

To confirm the location of the coherent exchange interaction  $\omega_e$ , and calibrate the exchange strength,  $g_1$ , we measure the population of Alice, Bob, and the coupler, as a function of the drive duration and frequency ( $\omega_d$ ), as shown in Fig. 4.

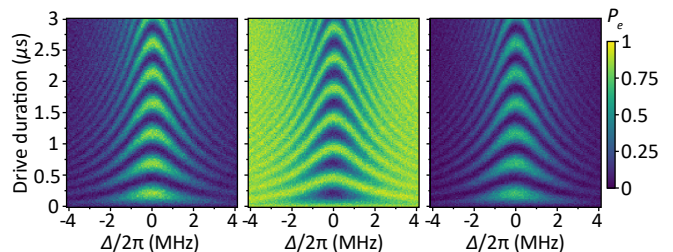

FIG. 4. **Coherent exchange of excitations between the coupler and the oscillators.** Left: probability of finding Alice in vacuum. Middle: probability of finding Bob in vacuum. Right: probability of the coupler being excited. System was initialized in  $|1\rangle|0\rangle|g\rangle$ .  $\Delta = 0$  corresponds to  $\omega_d = \omega_e$ , where exchange occurs in  $\sim 200$  ns. The coupler configuration corresponds to Fig. 2(a) in the main text.

The experiment starts by preparing the state  $|1\rangle|0\rangle|g\rangle$  through a numerical GRAPE pulse on the side transmon  $q_a$  and Alice. A microwave drive is applied to the coupler with variable duration  $t$  and frequency  $\omega_d$ . After the drive pulse, the system populations are measured. The coupler population is obtained via direct dispersive readout of its readout resonator, while the cavity populations are measured using selective  $\pi$ -pulses on their auxiliary transmon, conditioned on each cavity being in vacuum. The cavity data is normalized by the selective  $\pi$ -pulse

550 contrast, and the coupler population is corrected by the  
551 readout contrast.

552 The data exhibits the characteristic chevron pattern  
553 expected for a coherent exchange between  $|1\rangle|0\rangle|g\rangle$  and  
554  $|0\rangle|1\rangle|e\rangle$ . At zero detuning, the populations oscillate sin-  
555 usoidally in time with a frequency  $2g_1$  while detuning  
556 from the exchange condition leads to faster oscillations  
557 with reduced contrast. A line cut yields the oscillations  
558 shown in Fig. 2(a) of the main text, from which we can  
559 extract  $g_1/2\pi = 1.024 \pm 0.004$  MHz.

## 560 VIII. EXTENSION TO MULTI-PHOTON CODES

561 Due to the bosonic enhancement factor in the coupling  
562 strength, we can increase the gate speed by populating  
563 higher Fock states in the control cavity. We demonstrate  
564 this by measuring the phase acquired by the  $|+\rangle$  state  
565 during gate operation when the control cavity is in  $|2\rangle$   
566 and comparing it to the equivalent case when the control  
567 is in  $|1\rangle$ . The phases acquired as a function of time for  
568 both cases are shown in Fig. 5(a). Representative Wigner  
569 tomography snapshots at selected times for initial state  
570  $|+\rangle|2\rangle$  are shown in Fig. 5(b). We observe that the CZ  
571 gate time is reduced from  $\sim 5.5 \mu\text{s}$  to  $\sim 2.5 \mu\text{s}$ .

572 It is important to note that the gate time is reduced  
573 by more than a factor of two as the resonant condition  
574 is shifted by  $n\chi_b$  when the control cavity is prepared in  
575  $|n\rangle$  in accordance with Eq. 8. Since the gate detuning  
576 is defined with respect to the single-photon case and is  
577 kept constant for both experiments, the effective detuning  
578 becomes smaller for the two-photon state, leading to  
579 a gate rate that exceeds the simple factor-of-two scaling  
580 expected from bosonic enhancement alone. This entails  
581 that when the engineered dynamics is applied to multi-  
582 photon states, we must account for this difference in ef-  
583 fective detuning appropriately.

## 584 IX. PAULI BARS FOR OTHER STATES

585 Here, we present the reconstructed two-cavity density  
586 matrices in the Pauli decomposition, after applying 0 to  
587 6 CZ gates to the initial states  $|+\rangle|0\rangle$ ,  $|1\rangle|+\rangle$  and  $|+\rangle|+\rangle$ ,  
588 see Fig. 6. For the initial state  $|+\rangle|+\rangle$  we further distin-  
589 guish between the case of drive on and off (i.e.  $g_{CZ} = 0$ ).  
590 These data complement Fig. 3 of the main text, where  
591 the state fidelity is shown as a function of applied gates.

592 The density matrices are reconstructed from the mea-  
593 surement data using ORENS and Bayesian inference, see  
594 Section X for further details. The colored bars corre-  
595 spond to the experimentally reconstructed Pauli coeffi-  
596 cients. The black outlined bars indicate the ideal val-  
597 ues, while the dashed lines show the expected coeffi-  
598 cients obtained from numerical simulations. The sim-  
599 ulations are performed using the effective Hamiltonian  
600  $H_{\text{eff}} = g_{ab} a^\dagger a b^\dagger b$  with a gate time of  $5.5 \mu\text{s}$ . We perform  
601 the simulations including the experimentally-calibrated

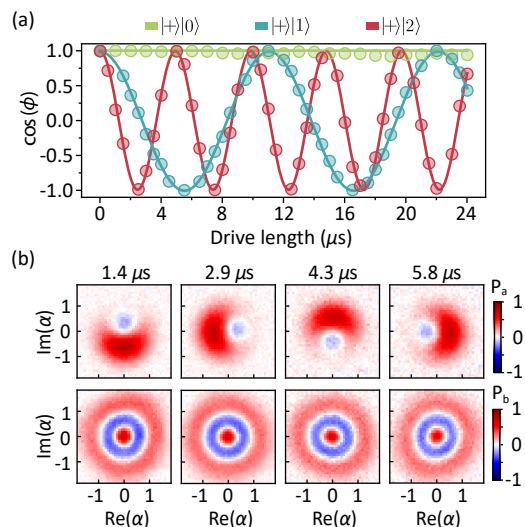

FIG. 5. **Bosonic enhancement of the gate rate.** (a) Phase acquired by the target cavity initialized in  $|+\rangle$  during the gate when the control cavity is prepared in  $|0\rangle$ ,  $|1\rangle$  and  $|2\rangle$ . The gate time is reduced from  $\sim 5.5 \mu\text{s}$  to  $\sim 2.5 \mu\text{s}$  when populating the control cavity with two photons. (b) Representative Wigner tomography snapshots of the target cavity at selected times for the initial state  $|+\rangle|2\rangle$ .

602 cavity decoherence parameters when the drive is on, with  
603  $T_{1a} = 210 \mu\text{s}$ ,  $T_{\phi a} = 70 \mu\text{s}$ ,  $T_{1b} = 388 \mu\text{s}$  and  $T_{\phi b} = 52 \mu\text{s}$ .  
604 See Section XI for further details.

605 Furthermore, Fig. 7 shows the reconstructed Pauli de-  
606 compositions after a single CZ gate applied to the initial  
607 states  $|-\rangle|-\rangle$ ,  $|i\rangle|i\rangle$  and  $|-i\rangle|-i\rangle$ , which ideally produce  
608 maximally entangled states under the engineered interac-  
609 tion. As above, the Pauli coefficients are obtained from  
610 measurements using ORENS combined with Bayesian infer-  
611 ence. The experimental results are compared to both  
612 the ideal states (black outline) and to numerical simula-  
613 tions including decoherence (dashed lines) using the same  
614 effective Hamiltonian and parameters described above.

## 615 X. QUANTUM STATE RECONSTRUCTION

616 We perform quantum state reconstruction following  
617 the Optimized Reconstruction with Excitation Number  
618 Sampling (ORENS) protocol. We extended the scheme  
619 in Ref. [12] for reconstructing two-mode cavity states. It  
620 involves applying a set of optimized displacement points  
621 on both cavities and performing photon number measure-  
622 ments. The measurement results are then processed to  
623 estimate the two-mode density matrix. Up to this point,  
624 the resulting density matrix might not be physical due to  
625 the presence of noise in the experimental data. Thus, we  
626 employ Bayesian inference to get a statistically accurate  
627 and physical estimated density matrix. The following  
628 two sections provide details on the implementation of the  
629 ORENS protocol and the Bayesian inference procedure  
630 used to obtain the final estimated density matrix.

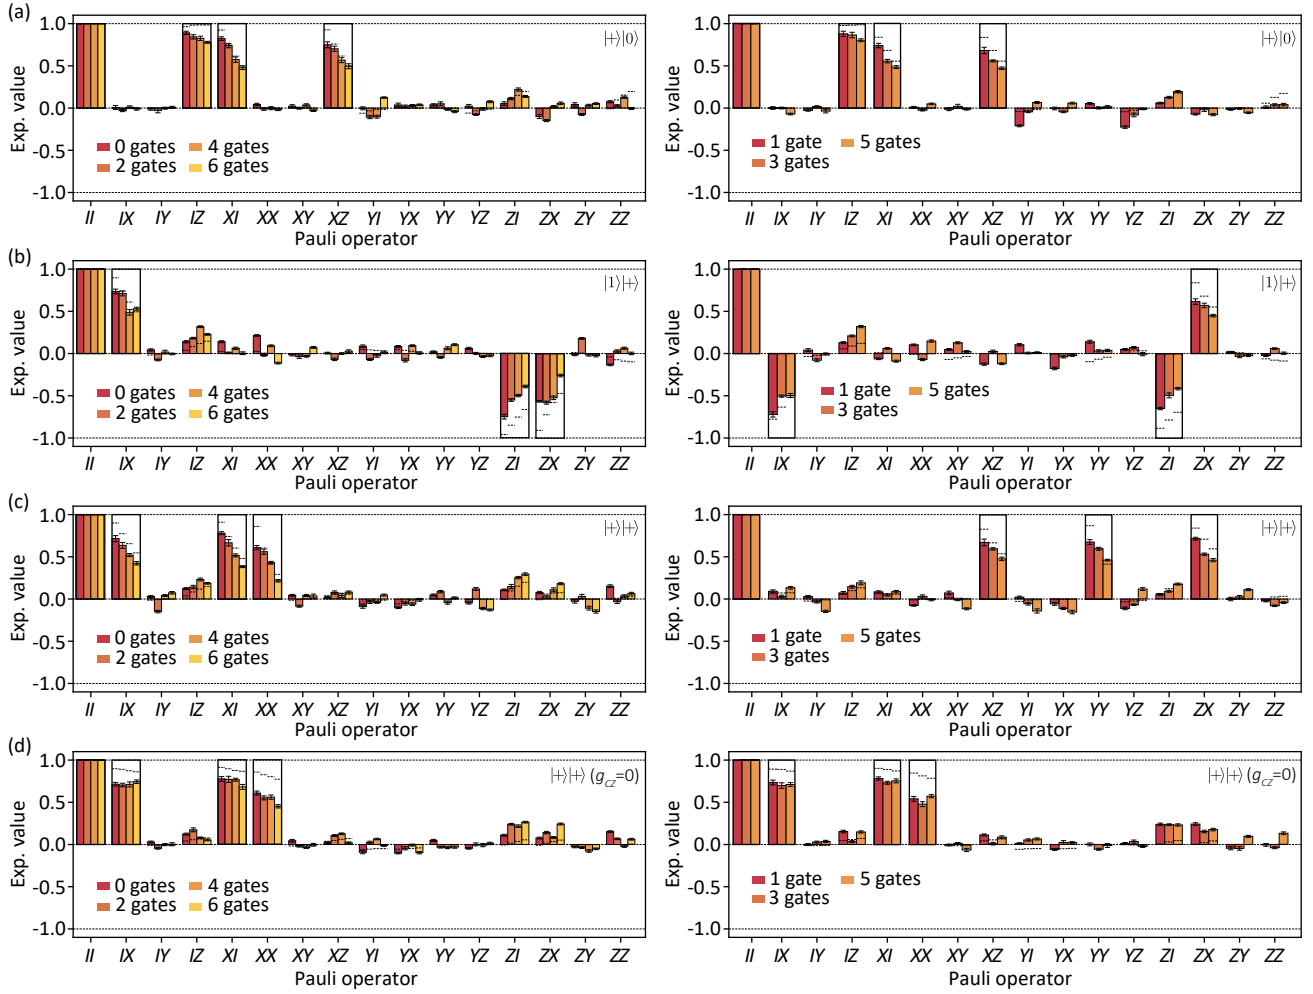

FIG. 6. **Reconstructed density matrices after several CZ gates.** Reconstructed two-cavity states in the Pauli operator representation after 0–6 applied CZ gates, for the initial states (a)  $|+\rangle|0\rangle$ , (b)  $|1\rangle|+\rangle$  (b), and (c) and (d)  $|+\rangle|+\rangle$  with drive on and off, respectively. Black outlines indicate the ideal values and dashed lines the numerical simulations including cavity decoherence.

### A. State reconstruction via ORENS

ORENS enables efficient quantum state tomography using the theoretical minimum number of measured single-valued observables, which are excitation (photon) number measurements performed after a set of optimized phase-space displacements. For reconstructing a single bosonic mode of dimension  $D$ , the least number of observables is  $N_{\text{obs}} = D^2 - 1$ . These are obtained using  $N_{\text{obs}}$  optimized displacement points, each followed by a measurement of a single photon number  $n$ . The set of observables can be written as  $X_i = \text{tr}(|n\rangle\langle n| \hat{D}^\dagger(\alpha_i) \rho \hat{D}(\alpha_i))$ , where  $i = 1, 2, \dots, N_{\text{obs}}$  and  $\{\alpha_i\}$  is the set of optimized displacement points obtained by minimizing the measurement matrix via a gradient descent algorithm [12].

An arbitrary density matrix  $\rho$  of dimension  $D$  can be parametrized by its  $D^2$  real parameters (without the normalization condition). In our case, we take the diagonal elements of  $\rho$  as well as its real and imaginary

off-diagonal (upper triangular) elements, which we shall arrange in a vector form  $\vec{Y}$ . The parameters ( $\vec{Y}$ ) and observables (also arranged in a vector form  $\vec{X}$ ) are linearly related [26]. In our case, we write this as  $\vec{Y} = M\vec{X}$ . Here,  $M$  is a mapping matrix, which can be computed given the set of optimized displacement points  $\{\alpha_i\}$  and photon number  $n$  to be measured. To get an estimate of the parameters  $\vec{Y}_{\text{est}}$ , given the experimental data  $\vec{X}$ , we apply the inverse of the matrix equation  $\vec{Y}_{\text{est}} = M^+ \vec{X}$  with  $M^+ = (M^\dagger M)^{-1} M^\dagger$  being the left Moore-Penrose pseudoinverse. From the estimated parameters, we then construct the density matrix  $\rho_{\text{LS}}$ . Given this density matrix, which might be unphysical, we employ Bayesian inference to get the final physical density matrix (see next section).

To reconstruct a two-mode cavity state in the present case, we use a total dimension of  $D = 4$  (2 for each mode) and  $D = 9$  (3 for each mode) for the case of 0/1 encoding and 0/2 encoding, respectively. This truncation is justi-

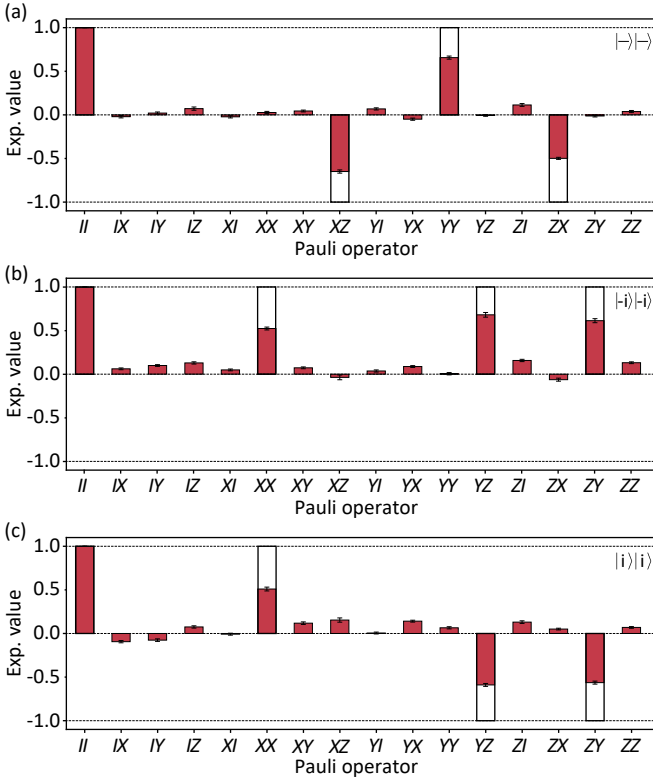

FIG. 7. **Reconstructed density matrices for other cardinal states.** Reconstructed two-cavity states in the Pauli operator representation after a single CZ gate applied to the initial states (a)  $|-\rangle|-\rangle$ , (b)  $|-i\rangle|-i\rangle$ , and (c)  $|i\rangle|i\rangle$ . Black outlines correspond to ideal states, and dashed lines to numerical simulations including cavity decoherence.

fied by the absence of any observed population in  $|2\rangle$  and  $|3\rangle$  after the gate, within readout error. The displacement operations we apply are of the form  $\{\hat{D}_a(\alpha_i) \otimes \hat{D}_b(\alpha_j)\}$ , where  $\{\alpha_i\}$  refers to the optimized displacements obtained via optimization for the single-mode tomography case. For the 0/1 and 0/2 encoding, we use a total of 25 and 100 different displacements, respectively. This exceeds the theoretical minimum of  $D^2 - 1$  in both encoding scenarios, providing an overcomplete set of observables that improves robustness to uncertainties and reduces the averaging required per observable. After each displacement, we measure the probability of observing the joint photon number  $|n\rangle_a \otimes |n\rangle_b$  in the two-mode cavity state. This is obtained through individual single-shot measurements of photon number  $|n\rangle$  in Alice and Bob, by applying selective  $\pi$ -pulses on their side transmons at frequencies  $\omega_{q_a} - n\chi_{a q_a}$  and  $\omega_{q_b} - n\chi_{b q_b}$ , respectively, and measuring the resulting excited state probabilities. By correlating the outcomes of these measurements for each experimental run, we obtain the joint probability of observing  $|n\rangle_a \otimes |n\rangle_b$  photons.

Note that as we use parametrization with  $D^2$  parameters (without enforcing the normalization condition), the density matrix obtained via linear inversion (least square)

$\rho_{LS}$  might not have unit trace and positive eigenvalues. We shall keep  $\rho_{LS}$  as a data-driven estimator that faithfully reflects the measurement outcomes, and use it solely as the reference point for a subsequent Bayesian inference procedure that restores physicality in the final estimated density matrix.

Two-mode state reconstruction has previously also been achieved by measuring the joint parity  $\langle \hat{P}_a \otimes \hat{P}_b \rangle$  [27]. However, this approach requires closely matched dispersive shifts  $\chi$  between transmon and both cavities, placing stringent constraints on the hardware. One can in principle perform separated single shot parity measurements for  $\hat{P}_a$  and  $\hat{P}_b$ , and correlate them to get  $\langle \hat{P}_a \otimes \hat{P}_b \rangle$ , as we did for photon number in this work. However, the traditional parity measurement  $\pi/2$ -wait- $\pi/2$  is known to suffer from coherent as well as incoherent errors [12]. A standard technique employed to counter this problem is to perform a corrected parity measurement, in which  $\langle \hat{P} \rangle_{\text{corr}} = (\langle \hat{P} \rangle - \langle \hat{P} \rangle_{\text{rev}})/2$  is measured. Here  $\langle \hat{P} \rangle_{\text{rev}}$  is obtained using a  $\pi/2$ -wait- $(-\pi/2)$  sequence. Implementing this technique in our device would require correlating 4 different measurements:  $\hat{P}_a$  with  $\hat{P}_b$ ;  $\hat{P}_a$  with  $\hat{P}_{B,\text{rev}}$ ;  $\hat{P}_{A,\text{rev}}$  with  $\hat{P}_b$ ; and  $\hat{P}_{A,\text{rev}}$  with  $\hat{P}_{B,\text{rev}}$ , therefore multiplying the number of required measurements by a factor of 4. This tomography method adds a factor of  $2^N$  to the total number of displacement points for  $N$ -mode state reconstruction, which is certainly less favorable compared to the method implemented in this work.

## B. Bayesian inference

To obtain a physical (positive semidefinite) estimated density matrix, a standard technique consists of performing linear inversion (as explained in the previous section) followed by maximum likelihood estimation [28]. However, this method suffers from the problem, that the estimated physical density matrix often has zero eigenvalues [29]. This is not justified by finite measurement statistics, as the absence of observed events cannot support the conclusion that the corresponding probabilities are exactly zero. Instead, we employ Bayesian inference, which gives a statistically more accurate estimate. Incorporating Bayes' rule, Bayesian inference provides a posterior probability distribution given the measured experimental data and prior knowledge. The posterior distribution can then be used (sampled) to get an estimate for any function of the density matrix. We follow an efficient Bayesian inference protocol introduced in Ref. [30].

We use uniform prior, i.e., no prior assumption on the density matrix, such that the posterior distribution is proportional to the pseudo likelihood function

$$\mathcal{L}(\rho) \propto \exp\left(-\frac{N}{2} \|\rho - \rho_{LS}\|^2\right) \quad (23)$$

where  $\|\cdot\|$  is the Frobenius norm and  $N$  is the total number of events (number of repetitions times num-

ber of applied displacements). We then draw a total of  $RT$  samples according to the Crank-Nicolson Metropolis-Hastings procedure, with a thinning parameter  $T = 2^7$  to reduce serial correlation in the subsequent samplings and keep only  $R = 2^{10}$  samples. The final reconstructed state is given by the Bayesian mean estimator:

$$\rho_{\text{BME}} = \frac{1}{R} \sum_{r=1}^R \rho_r \quad (24)$$

where  $\{\rho_r\}$  are the retained physical density matrices sampled from the posterior distribution. We calculate the fidelity between the density matrix  $\rho_{\text{BME}}$  and a target density matrix  $\rho_{\text{tar}}$  using:

$$\mathcal{F} = \left( \text{Tr} \sqrt{\sqrt{\rho_{\text{tar}}} \rho_{\text{BME}} \sqrt{\rho_{\text{tar}}}} \right)^2, \quad (25)$$

where  $\rho_{\text{tar}}$  is the target density matrix generated by simulating the numerical GRAPE pulses under realistic decoherence mechanisms, followed by propagation through an ideal gate model with no decoherence, where the effective Hamiltonian used is  $\hat{H}_{\text{eff}} = g_{ab} \hat{a}^\dagger \hat{a} \hat{b}^\dagger \hat{b}$ . This procedure isolates the sources of gate imperfections, such as system decoherence and spurious coupler excitations, from errors of the state preparation and measurement. A quantitative error budget is provided in Section XII.

## XI. DRIVE-INDUCED DECOHERENCE

### A. Strong drive effects on cavity coherences

In this work, we drive the coupler with a strong microwave tone to activate the cross-Kerr interaction. When operating in the Raman regime, the coupler is never physically populated, thereby mitigating errors arising directly from its decoherence mechanisms. Nevertheless, we observe a substantial reduction of the oscillator coherences as a function of both the drive strength and the detuning from the resonance condition described in the main text. To quantify the cavity properties under this strong drive, we characterize the driven single-photon lifetime of the oscillators by loading a photon in Alice (Bob) and replacing the delay time by a strong off-resonant drive applied to the coupler. We observe a degradation of  $T_1$  times from 700–900  $\mu\text{s}$  (800–1000  $\mu\text{s}$ ) to  $\sim 210$   $\mu\text{s}$  ( $\sim 390$   $\mu\text{s}$ ). The dephasing time of the oscillators was characterized via a Ramsey experiment where Alice (Bob) is initialized in a superposition  $(|0\rangle + |1\rangle)/\sqrt{2}$  and the delay time is replaced with a strong off-resonant drive. We observe a reduction in the oscillator  $T_2^*$  times from 500–600  $\mu\text{s}$  (700–900  $\mu\text{s}$ ) to  $\sim 40$   $\mu\text{s}$  ( $\sim 60$   $\mu\text{s}$ ).

The observed reduction in coherence is consistent with previous reports in strongly driven cQED systems [8, 31, 32]. We attribute the enhanced oscillator decay to drive-induced dissipation [23, 32], arising from the dressing of

the coupler by the off-resonant coherent exchange interaction. A simple model of this effect can be obtained by considering the first-order perturbative correction to the coupler decay operator,  $|g\rangle\langle e| \rightarrow |g\rangle\langle e| + [\hat{S}, |g\rangle\langle e|]$ , where  $\hat{S}$  is the SWT generator introduced in Section V. The resulting commutator generates an additional term  $\beta ab^\dagger (|g\rangle\langle g| - |e\rangle\langle e|)$ . Likewise, dressing the coupler dephasing operator yields  $\beta (a^\dagger b |g\rangle\langle e| + ab^\dagger |e\rangle\langle g|)$ . Operating the coupler away from its sweet spot, where  $T_\phi^c \sim 2$   $\mu\text{s}$ , may therefore lead to an effective oscillator dressed decay time of  $T_1^{a,b} \sim \beta^{-2} T_\phi^c \sim 200$   $\mu\text{s}$ , consistent with the observed driven coherence times. In addition, the applied drive induces AC Stark shifts of the coupler transitions, which can approach the cavity frequencies at large drive amplitudes. Furthermore, the off-resonant drive enhances hybridization between the modes, thereby increasing the inherited cavity decay [25, 33]. Similar to [32], there is a tradeoff between the gate time, which scales with  $\Delta$ , and the sideband-dressed oscillator decay, which scales as  $\Delta^{-2}$ . While this simple model provides a qualitatively consistent description of our observations, a more rigorous treatment is required to systematically account such drive-induced decoherence effects. This remains an active area of research and lies beyond the scope of the present work.

We further attribute the degradation of the oscillator dephasing time to two distinct mechanisms. First, dressed dephasing [33], arising from an elevated ancilla temperature in the Floquet basis. This contribution depends primarily on the drive-coupler detuning ( $\sim 280$  MHz) and is therefore insensitive to the interaction detuning ( $\Delta \sim 6$  MHz), resulting in a nearly flat photon-shot noise spectrum [32]. Second, the interplay between the enhanced oscillator decay rates and the direct cross-Kerr coupling between the oscillators leads to an additional, cross-Kerr dependent dephasing channel.

### B. Driven coupler decoherence

When the system is driven at the resonance condition, we observe a coherent exchange of excitations between the states  $\{|1\rangle|0\rangle|g\rangle, |0\rangle|1\rangle|e\rangle\}$ , as shown in Fig. 2(a) of the main text. The corresponding coupler population oscillations are presented in Fig. 8. In the presence of decoherence, dephasing reduces the oscillation contrast, while energy relaxation skews the dynamics toward the ground state. Following [8], we model the coupler oscillations as a function of the drive duration using

$$P_0(t) = Ae^{-\kappa_1 t} \left( 1 + e^{-\kappa_\phi t} \cos(2g_1 t + B) \right) + C, \quad (26)$$

where  $A$ ,  $B$ , and  $C$  are amplitude, initial phase and offset fitting parameters to compensate for state preparation and measurement (SPAM) imperfections;  $\kappa_\phi$  denotes the effective dephasing rate within the exchange subspace; and  $\kappa_1$  characterizes population decay to the vacuum state. From this fit, we extract effective coherence

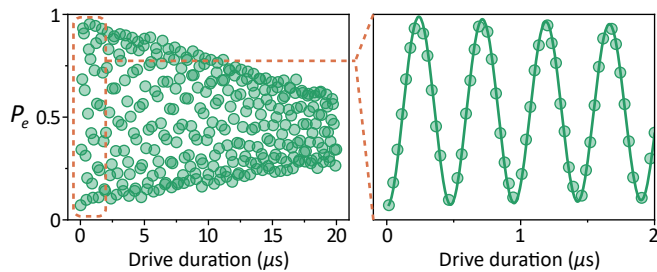

FIG. 8. **Coherent coupler oscillations.** Experimentally measured exchange oscillations of the coupler mode (green markers), used to fit Eq. 26 and extract the corresponding decay and dephasing times. The right panel shows a zoomed-in view of the first  $2\mu\text{s}$  of the oscillations. The solid line corresponds to master-equation simulations using the cavity and coupler decoherence rates, with the coupler dephasing time measured via a CPMG sequence.

times of  $\kappa_1^{-1} = 94 \pm 3\mu\text{s}$  and  $\kappa_\phi^{-1} = 28.0 \pm 0.4\mu\text{s}$ . Because the excitations involved in the interaction are delocalized across both cavities and the nonlinear coupler, these rates cannot be directly interpreted as averages of the individual cavity coherence times, in contrast to Ref. [8].

Instead, we perform full master equation simulations using the independently measured cavity and coupler decoherence rates. Importantly, using the bare coupler dephasing time extracted from Ramsey experiments predicts a significantly faster decay of the oscillations than is observed experimentally. This discrepancy indicates that the relevant coherence properties during the exchange process differ from those inferred from static measurements. It is well established that, under continuous driving, the effective coherence times of superconducting transmons are modified relative to their free-evolution values [34, 35]. To account for this, we adopt a coupler  $T_2$  time of  $13\mu\text{s}$ , corresponding to the experimentally measured decoherence time obtained via a Carr–Purcell–Meiboom–Gill (CPMG) sequence [36]. This choice is justified by the fact that the continuous drive effectively rotates the transmon Bloch vector, producing dynamics analogous to a repeated echo sequence. With this modification, the simulations are in very good agreement with the experimental data, as shown in the right panel of Fig. 8 and in Fig. 2(a) of the main text.

## XII. ERROR BUDGETING

In this section, we break down and estimate the different sources of infidelity affecting our experimental data. To this end, we perform full master equation simulations in which individual error mechanisms are introduced one at a time, allowing us to isolate their respective contributions. While this approach provides a useful estimate of each contribution to the infidelity, it does not capture potential correlations between error channels. We therefore also present simulations that incorporate all er-

ror sources simultaneously for comparison. Overall, both approaches yield a consistent reproduction of the experimentally measured values.

We begin by considering errors arising from SPAM in an idealized setting without decoherence. We simulate the numerical GRAPE pulses used to prepare the initial states using the Hamiltonian of Eq. 2, followed by an application of a single CZ gate, modeled by the effective Hamiltonian

$$H_{eff} = g_{ab} a^\dagger a b^\dagger b - \chi_a a^\dagger a |e\rangle\langle e| - \chi_b b^\dagger b |e\rangle\langle e|. \quad (27)$$

We then simulate the ORENS tomography using a pulse-based description, with realistic selective  $\pi$ -pulses and displacement operations, while neglecting readout errors. The infidelity of the reconstructed simulated final state is quantified as  $1 - |\langle \psi_{\text{sim}} | \psi_{\text{target}} \rangle|^2$ , where  $|\psi_{\text{target}}\rangle$  denotes the ideal state after the gate (e.g.  $|1\rangle|-\rangle$  for an initial state  $|1\rangle|+\rangle$ ). The infidelity obtained from this decoherence-free simulation (see turquoise bars in Fig. 9) arises primarily from imperfections in the state preparation, that generate small populations outside the  $0/1$  subspace, which cannot be captured by the  $D=2$  ORENS tomography. These leakage populations are sufficiently small not to be detected in experiments.

We then repeat the previous analysis, now including decoherence during both the initial state preparation and the ORENS tomography protocol. In addition, measurement errors are incorporated by applying the confusion matrices described in Section II D to the expected excited state populations of the side transmons. This contribution constitutes the dominant source of infidelity in our experiments (see red bars in Fig. 9) and is ultimately limited by the coherence times of the side transmons. We also consider infidelities arising from residual coupler population after the gate (green), corresponding to the residual excitations shown as green crosses in Fig. 2(b) of the main text, as well as from the driven decoherence of Alice (orange) and Bob (purple) during the gate, using the values described in Section XI. Each of these contributions is simulated by including only a single error mechanism at a time, without accounting for SPAM errors. Finally, we compute the total infidelity by including all decoherence channels simultaneously (dotted lines). In some cases, this results in a lower infidelity than that obtained by summing the individual contributions, indicating that certain error mechanisms are not independent. For instance, cavity decoherence can partially suppress spurious populations outside the tomography subspace, thereby mitigating their contribution to the total infidelity. For the states in the  $0/2$  subspace, we further simulate the effect of post-selection by projecting the simulated states into the even-parity subspace (dotted lines) before passing them into the ORENS tomography simulation. Overall, for a single gate, the SPAM errors dominate the infidelity, whereas for increasing numbers of gates (Fig. 3(e) in the main text), cavity decoherence becomes the leading error mechanism.

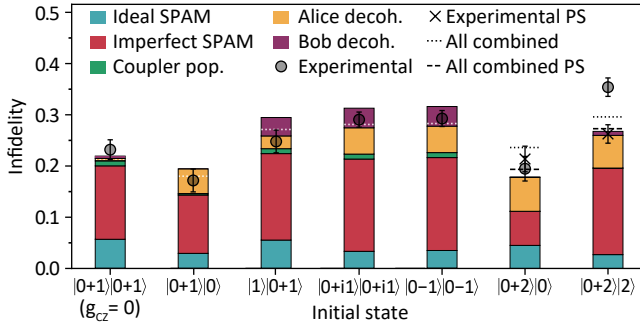

FIG. 9. **Error budgeting for the CZ gate.** Stacked bars show simulated contributions to the infidelity arising from SPAM (with and without decoherence), coupler population, and cavity decoherence for several initial states. Dotted lines indicate simulations that include all error channels simultaneously, while gray markers denote the experimentally measured infidelities. For the last two states, we show the simulated (dashed line) and experimental (crosses) infidelities after post-selecting (PS) the data on the cavities being in an even-parity state.

### 931 XIII. CROSS-KERR IN 3-WAVE MIXING

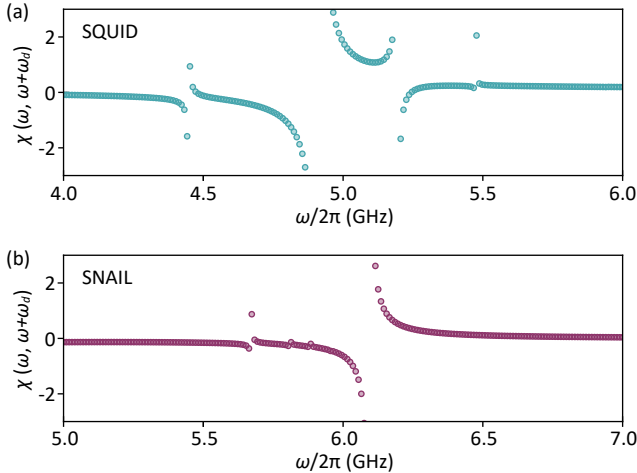

FIG. 10. **SQUID and SNAIL susceptibilities.** Real part of the susceptibility of a (a) SQUID, (b) SNAIL, quantifying the coupler response to a probe at  $\omega$  when driven at  $\omega_d$ . The SNAIL, biased at its Kerr-free point, exhibits fewer spurious resonances than the SQUID for the same drive amplitude.

932 The Raman-assisted protocol presented in this work  
 933 employs a SQUID coupler and concatenates two 4-  
 934 wave mixing processes to engineer an effective 6th-order  
 935 Hamiltonian term (involving 2 drive photons). While this  
 936 activates the desired cross-Kerr interaction, it also intro-  
 937 duces parasitic effects. The always-on dispersive coupling  
 938 between the cavities and the coupler modifies the effective  
 939 drive detuning from the coherent exchange condition as a  
 940 function of the cavities photon number. In addition, AC  
 941 Stark shifts arising from the 4-wave mixing dynamics can  
 942 lead to undesired frequency collisions under strong drives.

943 Finally, the nonlinear mixing between all the modes that  
 944 participate in the coupler junction gives rise to a spec-  
 945 trum of spurious transitions that constrains the choice  
 946 of drive parameters. Although spurious transitions in-  
 947 volving cavity modes are spectrally narrow, sufficient de-  
 948 tuning is required to suppress off-resonant second-order  
 949 processes.

950 To mitigate these imperfections, we envision replac-  
 951 ing the SQUID coupler with a tailored 3-wave mix-  
 952 ing element. For example, a linear inductive coupler  
 953 (LINC) [37] or a Superconducting Nonlinear Asymmet-  
 954 ric Inductive eLement (SNAIL) biased to the operating  
 955 point where it only exhibits 3- and 5-wave mixing [38].  
 956 For the remainder of this section we focus on the latter  
 957 as a concrete example. The SNAIL Hamiltonian is

$$H^S/\hbar = \omega_s \hat{s}^\dagger \hat{s} + g_3 (\hat{s} + \hat{s}^\dagger)^3 + g_5 (\hat{s} + \hat{s}^\dagger)^5 + \dots, \quad (28)$$

958 where  $\hat{s}$  is the annihilation operator of the SNAIL mode,  
 959 and  $g_3$  and  $g_5$  are its third- and fifth-order nonlinearities.  
 960 Coupling the SNAIL to both oscillators and driving at a  
 961 frequency  $\omega_d^{(S)} = \omega_c - \omega_a$  engineers the interaction

$$\hat{H}_d^{(3)}/\hbar = g_3 (\hat{a}^\dagger \hat{s} + \hat{a} \hat{s}^\dagger). \quad (29)$$

962 At this same resonant condition, the 5-wave mixing term

$$\hat{H}_d^{(5)}/\hbar = g_5 (\hat{a}^\dagger \hat{b}^\dagger \hat{b} \hat{s} + \hat{a} \hat{b} \hat{b}^\dagger \hat{s}^\dagger) \quad (30)$$

963 is also resonant. As in the SQUID case, driving with  
 964 a detuning  $\Delta$  from this resonance activates a Raman-  
 965 assisted interaction between  $\hat{H}_d^{(3)}$  and  $\hat{H}_d^{(5)}$ , yielding an  
 966 effective Hamiltonian

$$\hat{H}_{\text{eff}}^S/\hbar = \frac{g_3 g_5}{\Delta} \hat{a}^\dagger \hat{a} \hat{b}^\dagger \hat{b} (|g\rangle\langle g| - |e\rangle\langle e|). \quad (31)$$

967 Here we assume that, despite operating at its Kerr-free  
 968 point, the SNAIL retains a small but finite anharmonic-  
 969 ity from its 3-wave mixing term. Provided the drive am-  
 970 plitude and bandwidth remain small compared to this  
 971 anharmonicity, leakage to higher excited states is sup-  
 972 pressed, and the coupler can be approximated as an ef-  
 973 fective two-level system, with  $\hat{s} = |g\rangle\langle e|$ .

974 Using a 3-wave mixing element would not only solve  
 975 the problem of photon-number-dependent cross-Kerr  
 976 couplings, but also significantly reduce drive-induced fre-  
 977 quency shifts and suppress many of the spurious multi-  
 978 photon processes inherent to 4-wave mixing. To illustrate  
 979 the latter, we compare the susceptibility  $\chi(\omega, \omega + \omega_d)$  of  
 980 a SQUID and a SNAIL coupler, following the procedure  
 981 of [25], see Fig. 10. Here, the susceptibility characterizes  
 982 the frequency-converting response of the coupler, relat-  
 983 ing a probe at frequency  $\omega$  to a response at  $\omega + \omega_d$ , where  
 984  $\omega_d$  is the drive frequency. When the cross-Kerr drive is  
 985 on, the SNAIL exhibits fewer activated resonances across  
 986 the probe frequency spectrum, resulting in a significantly  
 987 cleaner susceptibility profile.

- [1] Y. Y. Gao, B. J. Lester, Y. Zhang, C. Wang, S. Rosenblum, L. Frunzio, L. Jiang, S. Girvin, and R. J. Schoelkopf, Programmable interference between two microwave quantum memories, *Physical Review X* **8**, 021073 (2018).
- [2] X. Zhao, P. Liao, F. A. Mele, U. Chabaud, and Q. Zhuang, Complexity of quantum tomography from genuine non-gaussian entanglement, *Nature Communications* (2025).
- [3] J. Guo, S. Liu, M. Fadel, and Q. He, Non-gaussian entanglement hierarchy based on the schmidt number, arXiv preprint arXiv:2605.18605 (2026).
- [4] S. Rosenblum, Y. Y. Gao, P. Reinhold, C. Wang, C. J. Axline, L. Frunzio, S. M. Girvin, L. Jiang, M. Mirrahimi, M. H. Devoret, *et al.*, A cnot gate between multiphoton qubits encoded in two cavities, *Nature communications* **9**, 652 (2018).
- [5] N. Mehta, J. D. Teoh, T. Noh, A. Agrawal, A. Anderson, B. Birdsall, A. Brahmhatt, W. Byrd, M. Cacioppo, A. Cabrera, *et al.*, Bias-preserving and error-detectable entangling operations in a superconducting dual-rail system, arXiv preprint arXiv:2503.10935 (2025).
- [6] Y. Xu, Y. Ma, W. Cai, X. Mu, W. Dai, W. Wang, L. Hu, X. Li, J. Han, H. Wang, *et al.*, Demonstration of controlled-phase gates between two error-correctable photonic qubits, *Physical review letters* **124**, 120501 (2020).
- [7] K. Reuer, J.-C. Besse, L. Wernli, P. Magnard, P. Kurpiers, G. J. Norris, A. Wallraff, and C. Eichler, Realization of a universal quantum gate set for itinerant microwave photons, *Physical Review X* **12**, 011008 (2022).
- [8] Y. Lu, A. Maiti, J. W. Garmon, S. Ganjam, Y. Zhang, J. Claes, L. Frunzio, S. M. Girvin, and R. J. Schoelkopf, High-fidelity parametric beamsplitting with a parity-protected converter, *nature communications* **14**, 5767 (2023).
- [9] B. J. Chapman, S. J. De Graaf, S. H. Xue, Y. Zhang, J. Teoh, J. C. Curtis, T. Tsunoda, A. Eickbusch, A. P. Read, A. Koottandavida, *et al.*, High-on-off-ratio beamsplitter interaction for gates on bosonically encoded qubits, *PRX Quantum* **4**, 020355 (2023).
- [10] Z. K. Mineev, Z. Leghtas, S. O. Mundhada, L. Christakis, I. M. Pop, and M. H. Devoret, Energy-participation quantization of josephson circuits, *npj Quantum Information* **7**, 131 (2021).
- [11] R. W. Heeres, P. Reinhold, N. Ofek, L. Frunzio, L. Jiang, M. H. Devoret, and R. J. Schoelkopf, Implementing a universal gate set on a logical qubit encoded in an oscillator, *Nature communications* **8**, 94 (2017).
- [12] T. Krisnanda, C. Y. Fontaine, A. Copetudo, P. Song, K. X. Lee, N.-N. Huang, F. Valadares, T. C. Liew, and Y. Y. Gao, Demonstrating efficient and robust bosonic state reconstruction via optimized excitation counting, *PRX Quantum* **6**, 010303 (2025).
- [13] M. Hutchings, J. B. Hertzberg, Y. Liu, N. T. Bronn, G. A. Keefe, M. Brink, J. M. Chow, and B. Plourde, Tunable superconducting qubits with flux-independent coherence, *Physical Review Applied* **8**, 044003 (2017).
- [14] F. Valadares, N.-N. Huang, K. T. N. Chu, A. Dorogov, W. Chua, L. Kong, P. Song, and Y. Y. Gao, On-demand transposition across light-matter interaction regimes in bosonic cqcd, *Nature Communications* **15**, 5816 (2024).
- [15] J. Zimmerman, Sensitivity enhancement of superconducting quantum interference devices through the use of fractional-turn loops, *Journal of Applied Physics* **42**, 4483 (1971).
- [16] Y. Sunada, S. Kono, J. Ilves, S. Tamate, T. Sugiyama, Y. Tabuchi, and Y. Nakamura, Fast readout and reset of a superconducting qubit coupled to a resonator with an intrinsic purcell filter, *Physical Review Applied* **17**, 044016 (2022).
- [17] D. T. McClure, H. Paik, L. S. Bishop, M. Steffen, J. M. Chow, and J. M. Gambetta, Rapid driven reset of a qubit readout resonator, *Physical Review Applied* **5**, 011001 (2016).
- [18] R. W. Heeres, B. Vlastakis, E. Holland, S. Krastanov, V. V. Albert, L. Frunzio, L. Jiang, and R. J. Schoelkopf, Cavity state manipulation using photon-number selective phase gates, *Physical review letters* **115**, 137002 (2015).
- [19] J. R. Schrieffer and P. A. Wolff, Relation between the anderson and kondo hamiltonians, *Physical Review* **149**, 491 (1966).
- [20] J. Koch, T. M. Yu, J. Gambetta, A. A. Houck, D. I. Schuster, J. Majer, A. Blais, M. H. Devoret, S. M. Girvin, and R. J. Schoelkopf, Charge-insensitive qubit design derived from the cooper pair box, *Physical Review A—Atomic, Molecular, and Optical Physics* **76**, 042319 (2007).
- [21] S. O. Mundhada, A. Grimm, S. Touzard, U. Vool, S. Shankar, M. H. Devoret, and M. Mirrahimi, Generating higher-order quantum dissipation from lower-order parametric processes, *Quantum Science and Technology* **2**, 024005 (2017).
- [22] M. Grifoni and P. Hänggi, Driven quantum tunneling, *Physics Reports* **304**, 229 (1998).
- [23] X. You, A. C. Li, T. Roy, S. Zhu, A. Romanenko, A. Grassellino, Y. Lu, and S. Chakram, Floquet-engineered fast snap gates in weakly coupled circuit-qed systems, *Physical Review Applied* **24**, 034072 (2025).
- [24] N. Lambert, E. Giguère, P. Menczel, B. Li, P. Hopf, G. Suárez, M. Gali, J. Lishman, R. Gadhvi, R. Agarwal, *et al.*, Qutip 5: The quantum toolbox in python, *Physics Reports* **1153**, 1 (2026).
- [25] Y. Zhang, J. C. Curtis, C. S. Wang, R. J. Schoelkopf, and S. M. Girvin, Drive-induced nonlinearities of cavity modes coupled to a transmon ancilla, *Physical Review A* **105**, 022423 (2022).
- [26] T. Krisnanda, H. Xu, S. Ghosh, and T. C. Liew, Tomographic completeness and robustness of quantum reservoir networks, *Physical Review A* **107**, 042402 (2023).
- [27] C. Wang, Y. Y. Gao, P. Reinhold, R. W. Heeres, N. Ofek, K. Chou, C. Axline, M. Reagor, J. Blumoff, K. Sliwa, *et al.*, A schrödinger cat living in two boxes, *Science* **352**, 1087 (2016).
- [28] J. A. Smolin, J. M. Gambetta, and G. Smith, Efficient method for computing the maximum-likelihood quantum state from measurements with additive gaussian noise, *Physical review letters* **108**, 070502 (2012).
- [29] R. Blume-Kohout, Optimal, reliable estimation of quantum states, *New Journal of Physics* **12**, 043034 (2010).
- [30] J. M. Lukens, K. J. Law, A. Jasra, and P. Lougovski,

- 1110 A practical and efficient approach for bayesian quan- 1126  
 1111 tum state estimation, *New Journal of Physics* **22**, 063038 1127  
 1112 (2020). 1128
- 1113 [31] L. Carde, P. Rouchon, J. Cohen, and A. Petrescu, Flux- 1129  
 1114 pump-induced degradation of  $t_1$  for dissipative cat 1130  
 1115 qubits, *Physical Review Applied* **23**, 024073 (2025). 1131
- 1116 [32] T. Kim, T. Roy, X. You, A. C. Li, H. Lamm, 1132  
 1117 O. Pronitchev, M. Bal, S. Garattoni, F. Crisa, D. Bafia, 1133  
 1118 *et al.*, Ultracoherent superconducting cavity-based multi- 1134  
 1119 qudit platform with error-resilient control, arXiv preprint 1135  
 1120 arXiv:2506.03286 (2025). 1136
- 1121 [33] Y. Zhang, B. J. Lester, Y. Y. Gao, L. Jiang, 1137  
 1122 R. Schoelkopf, and S. Girvin, Engineering bilinear mode 1138  
 1123 coupling in circuit qed: Theory and experiment, *Physical* 1139  
 1124 *Review A* **99**, 012314 (2019). 1140
- 1125 [34] F. Yan, S. Gustavsson, J. Bylander, X. Jin, F. Yoshihara, 1141  
 1142 D. G. Cory, Y. Nakamura, T. P. Orlando, and W. D. Oliver, Rotating-frame relaxation as a noise spectrum analyser of a superconducting qubit undergoing driven evolution, *Nature communications* **4**, 2337 (2013).
- [35] G. Ithier, E. Collin, P. Joyez, P. Meeson, D. Vion, D. Esteve, F. Chiarello, A. Shnirman, Y. Makhlin, J. Schrieffer, and G. Schön, Decoherence in a superconducting quantum bit circuit, *Physical Review B* **72**, 134519 (2005).
- [36] H. Y. Carr and E. M. Purcell, Effects of diffusion on free precession in nuclear magnetic resonance experiments, *Physical review* **94**, 630 (1954).
- [37] A. Maiti, J. W. Garmon, Y. Lu, A. Miano, L. Frunzio, and R. J. Schoelkopf, Linear quantum coupler for clean bosonic control, *PRX Quantum* **6**, 040326 (2025).
- [38] N. Frattini, U. Vool, S. Shankar, A. Narla, K. Sliwa, and M. Devoret, 3-wave mixing josephson dipole element, *Applied Physics Letters* **110** (2017).
